# Supplementary material for: Local sequence features that influence AP-1 cis-regulatory activity
Source: HighWire-hosted journal article supplement (doi:10.1101/gr.226530.117), 2018-01-05
Supplement: Supplemental_Figures_Tables.docx [file Supplemental_Figures_Tables.docx]

Supplemental Material for

**Local sequence features that specify AP-1 *cis*-regulatory activity**

Hemangi G. Chaudhari and Barak A. Cohen

List of supplemental data, each included as a tab-separated text file:

Supplemental Data SD1: Expression data of sequences in Library 1.

Supplemental Data SD2: Expression data of sequences in Library 2, Part 1.

Supplemental Data SD3: Expression data of sequences in Library 2, Part 2.

Supplemental Data SD4: Expression data of sequences in Library 3.

Supplemental Data SD5: Motif matches to saturation mutagenesis substitutions.

Supplemental Data SD6: Motifs from logistic regression.

### **Supplemental Table S1: Effect of single base mutations on activity in Library 2**

|  | Wild-type | AP-1mut |
| --- | --- | --- |
| Total number of flanking substitutions tested | 2565 | 2565 |
| Statistically significant change from parent | 814 | 618 |
| Increased expression | 285 | 354 |
| Decreased expression | 529 | 455 |
| > 2-fold change | 92 | 30 |

###

### **Supplemental Table S2: Library 1 composition**

| Type | Wild-type | AP-1mut | Lengths per sequence | Total |
| --- | --- | --- | --- | --- |
| High Expression | 40 | 109 | 5 | 745 |
| Low Expression | 41 | 110 | 5 | 755 |
| Positive Controls | 5 | 14 | 5 | 70 |
| Experimental Controls | 20 | - | 1 | 20 |
| Basal | 35 | - | 1 | 35 |
|  |  |  | Total with 4 barcodes | 6500 |

###

### **Supplemental Table S3: Library 2 composition**

| Type | Wild-type | AP-1mut | Variants | Total |  |
| --- | --- | --- | --- | --- | --- |
| Parental Sequences | 20 | 20 | - | 80 | Both parts |
| Saturation Mutants | 20 | 20 | ~150 each | 5959 |  |
| Positive Control | 1 | 1 | ~150 each | 293 |  |
| Weak Enhancers | 156 |  |  | 156 |  |
| Basal | 35 |  |  | 70 | Both parts |
| Experimental Controls | 40 |  |  | 80 | Both parts |
| Positive Controls | 15 |  |  | 30 | Both parts |
| Common | 41 |  |  | 82 | Both parts |
|  |  |  |  | Total with 4 barcodes | 27000 |

###

### **Supplemental Table S4: Library 3 composition**

| Type | Number |
| --- | --- |
| DHS | 5000 |
| AP-1 mutant (AP-1mut) | 250 |
| Positive Controls | 5 |
| Experimental Controls | 40 |
| Basal | 80 |
| Library 2 | 20 |
| Total with 5 barcodes | 26975 |

###

### **Supplemental Table S5: Primers and adapters used in this study**

| Primer | Sequence | Annealing Temp (oC)  (Phusion) | Description |
| --- | --- | --- | --- |
| 1F | GTAGCATCTGTCC | 57 | Amplification of Agilent Library 1 |
| 1R | CGACTACTACTACG | 57 | Amplification of Agilent Library 1 |
| 2F | GTCGAGAGTCGCAGGCTA | 60 | Amplification of Agilent Library 2, Part 1 |
| 2R | CTGATGGCACTCGGTCTAGAC | 60 | Amplification of Agilent Library 2, Part 1 |
| 3F | CGGAGTCGAGACGTATGTGC | 62 | Amplification of Agilent Library 2, Part 2 |
| 3R | TGATGGTGTAGCGATCTAGAGC | 62 | Amplification of Agilent Library 2, Part 2 |
| 4F | GGAGGTCCACTGACTAGTGCT | 64 | Amplification of Agilent Library 3 |
| 4R | ACCTTGACGATCCGTCTGC | 64 | Amplification of Agilent Library 3 |
| 5F | TACACCGTGGTGGAGCAGTA | 55 | Amplification of barcodes from cDNA |
| 5R | AGCGTACTCGAGTTGTTAACTTGTTTATTGCAGCTT | 55 | Amplification of barcodes from cDNA |
| 6F | AATGATACGGCGACCACCGAGATCTACACTCTTTCCCTACACGACGCTCTTCCGATCTGCTCGATCAT*G | - | P1 Illumina adapter cDNA Replicate 1 |
| 6R | /5Phos/ATCGAGCAGATCGGAAGAGCGTCGTGTAGGGAAAGAGTGTAGATCTCGGTGGTCGCCGTATCATT | - | P1 Illumina adapter cDNA Replicate 1 |
| 7F | AATGATACGGCGACCACCGAGATCTACACTCTTTCCCTACACGACGCTCTTCCGATCTTAGACTATCAT*G | - | P1 Illumina adapter cDNA Replicate 2 |
| 7R | /5Phos/ATAGTCTAAGATCGGAAGAGCGTCGTGTAGGGAAAGAGTGTAGATCTCGGTGGTCGCCGTATCATT | - | P1 Illumina adapter cDNA Replicate 2 |
| 8F | AATGATACGGCGACCACCGAGATCTACACTCTTTCCCTACACGACGCTCTTCCGATCTCGCTACCCTCAT*G | - | P1 Illumina adapter cDNA Replicate 3 |
| 8R | /5Phos/AGGGTAGCGAGATCGGAAGAGCGTCGTGTAGGGAAAGAGTGTAGATCTCGGTGGTCGCCGTATCATT | - | P1 Illumina adapter cDNA Replicate 3 |
| 9F | AATGATACGGCGACCACCGAGATCTACACTCTTTCCCTACACGACGCTCTTCCGATCTATAGTGGACACAT*G | - | P1 Illumina adapter cDNA Replicate 4 |
| 9R | /5Phos/TGTCCACTATAGATCGGAAGAGCGTCGTGTAGGGAAAGAGTGTAGATCTCGGTGGTCGCCGTATCATT | - | P1 Illumina adapter cDNA Replicate 4 |
| 10F | AATGATACGGCGACCACCGAGATCTACACTCTTTCCCTACACGACGCTCTTCCGATCTGTCAGTAGGTACAT*G | - | P1 Illumina adapter DNA |
| 10R | /5Phos/TACCTACTGACAGATCGGAAGAGCGTCGTGTAGGGAAAGAGTGTAGATCTCGGTGGTCGCCGTATCATT | - | P1 Illumina adapter DNA |
| 11F | /5Phos/T*CGAAGATCGGAAGAGCACACGTCTGAACTCCAGTCACAGCGTGCCCATCTCGTATGCCGTCTTCTGCTTG | - | P2 Illumina adapter |
| 11R | CAAGCAGAAGACGGCATACGAGATGGGCACGCTGTGACTGGAGTTCAGACGTGTGCTCTTCCGATCT | - | P2 Illumina adapter |
| 12F | AATGATACGGCGACCACCGAG | 66 | Enrichment PCR primer |
| 12R | CAAGCAGAAGACGGCATACGAGAT | 66 | Enrichment PCR primer |

**Supplemental Table S6: Sequencing depth for all libraries**

| Library | Library complexity | Reads (million) | Sequencing Platform | Read type |
| --- | --- | --- | --- | --- |
| 1 | 6500 | 88 | HiSeq Illumina | 1x50 |
| 2, Part 1 | 13500 | 178 | HiSeq Illumina | 1x50 |
| 2, Part 2 | 13500 | 186 | HiSeq Illumina | 1x50 |
| 3 | 26975 | 210 | NextSeq Illumina | 1x75 |

### **Supplementary Figures**


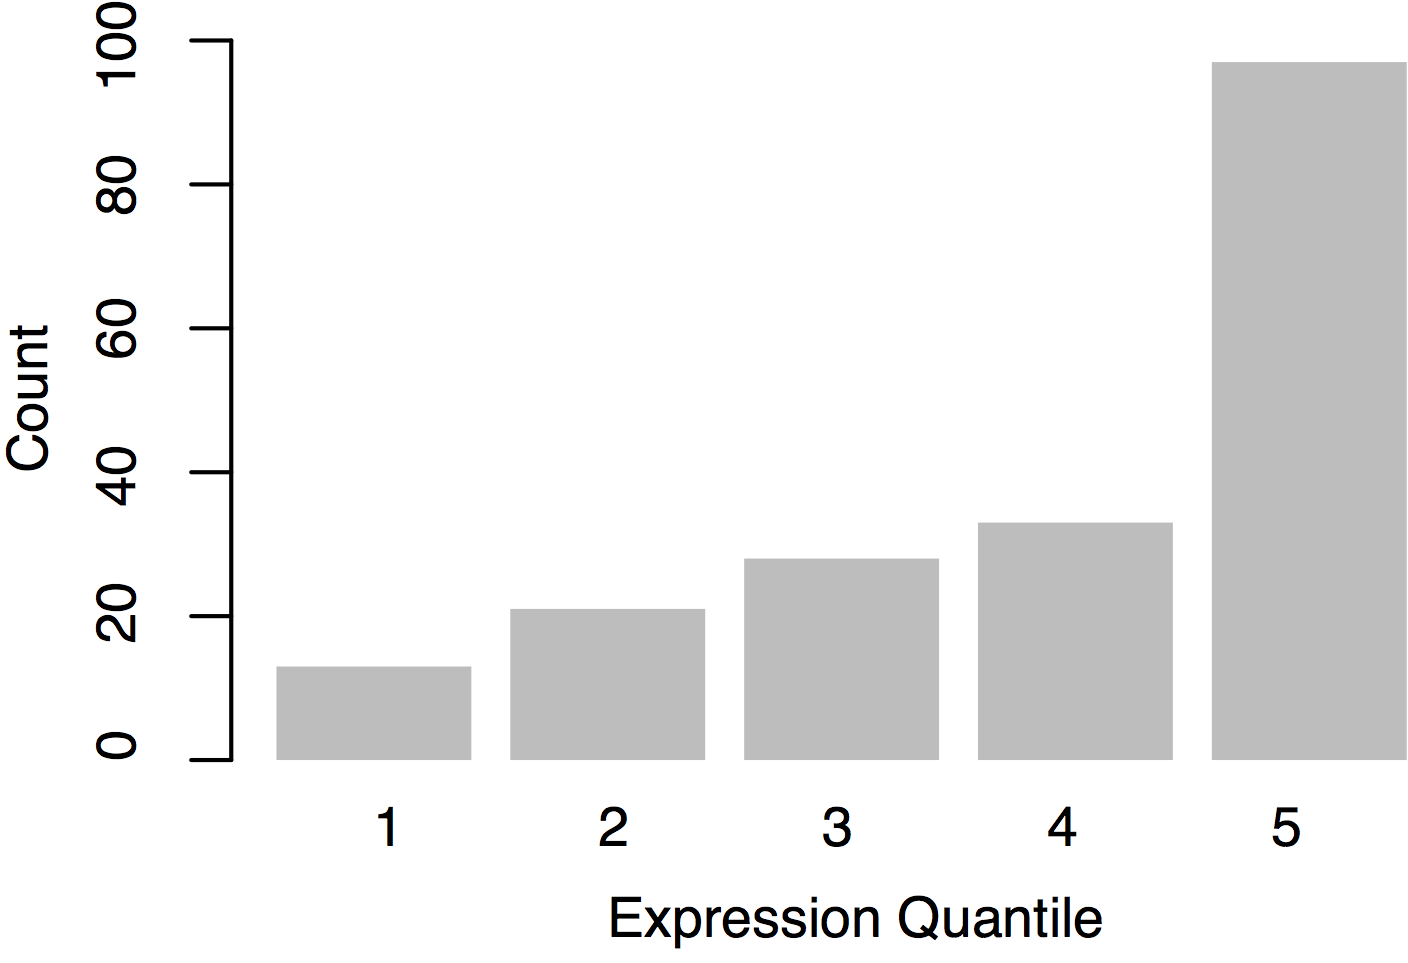


**Supplemental Fig S1**: Distribution of expression levels driven by sequences containing AP-1 binding sites in K562 cells. 192 sequences containing the AP-1 site were tested in K562 cells using a massively parallel reporter gene assay in a library of 13,000 elements. Sequences in expression quantile five were defined as active. Only 50% of the 192 sequences were present in quantile five. Data from Kwasnieski et al. 2014.


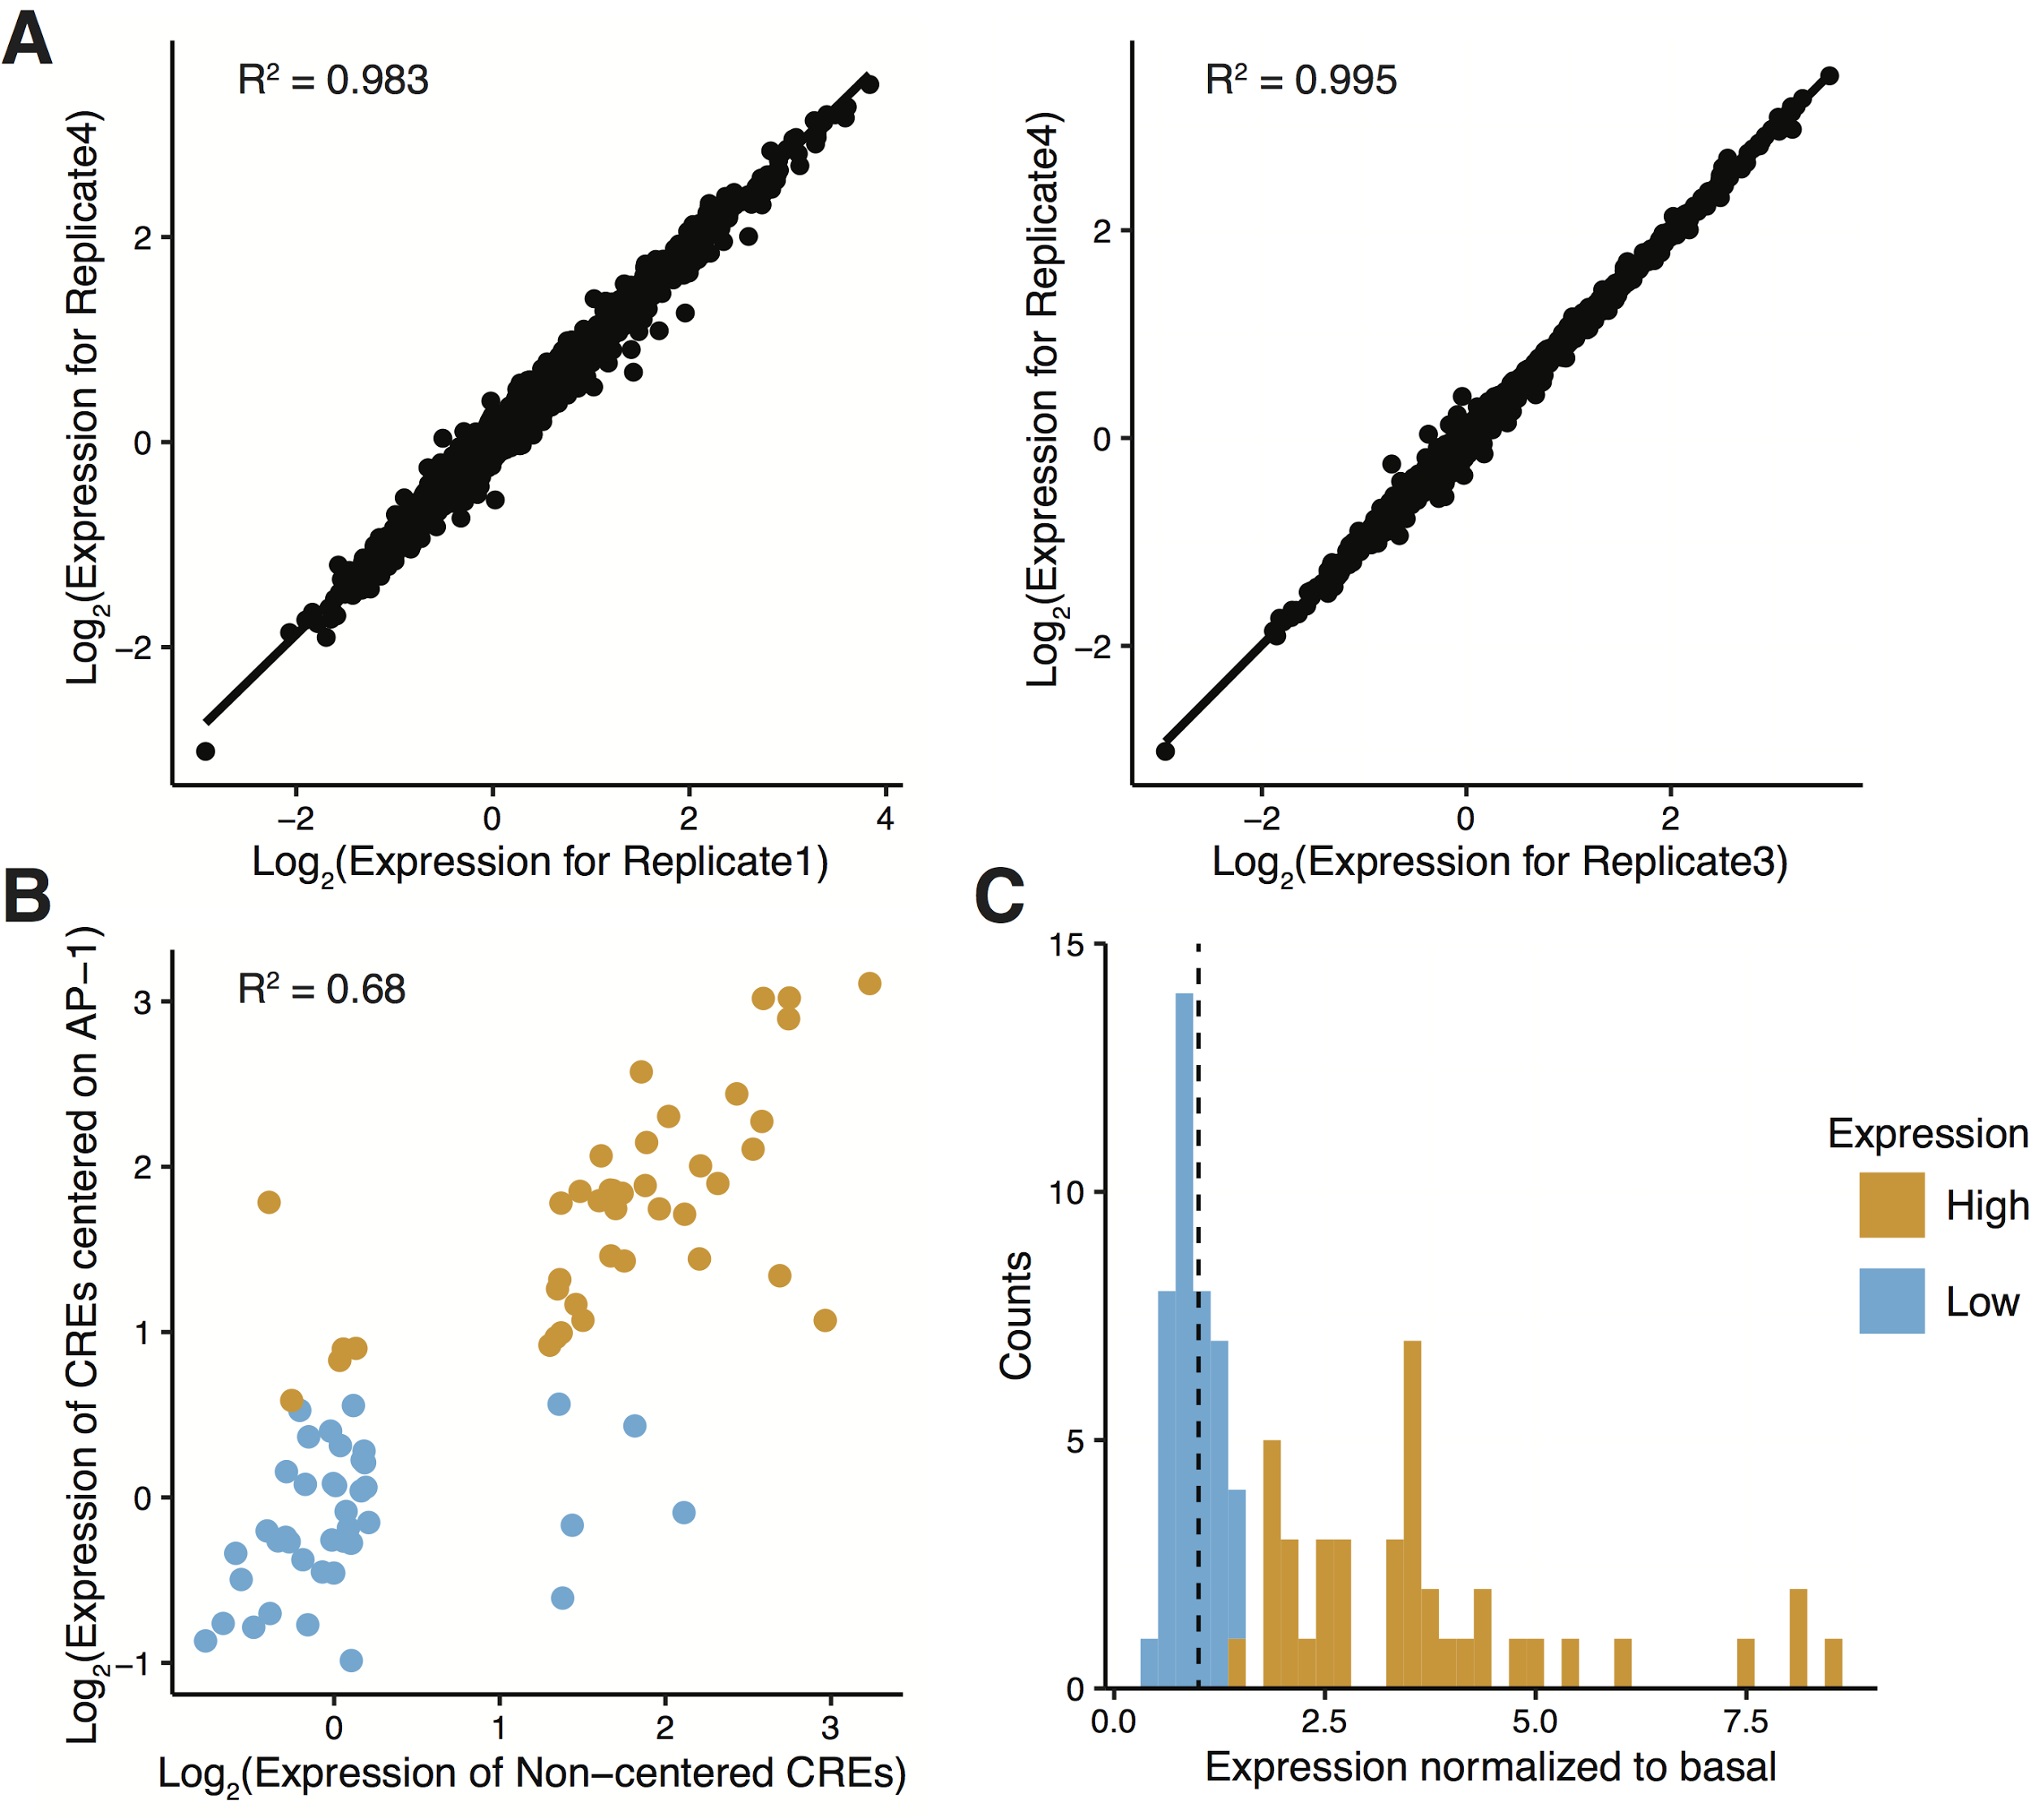


**Supplemental Fig S2:** Expression distribution for sequences in Library 1. ***A.*** Replicate experiments were highly reproducible. We performed four independent transfections of the plasmid library. Each point depicts the expression of a regulatory element averaged across four barcodes. Correlation between replicates 1 and 4 was the lowest (left, R2 = 0.983) and correlation between replicates 3 and 4 was the highest (right, R2 = 0.995). ***B.*** Expression of 130 bp sequences centered on AP-1 was highly correlated to the starting set of sequences (R2 = 0.68). Each point represents the expression of one regulatory element, colored by its classification in the starting set. ***C.*** HIGH and LOW groups were redefined for 130 bp AP-1 centered sequences based on median expression. Dotted line shows expression level of basal control construct.

**
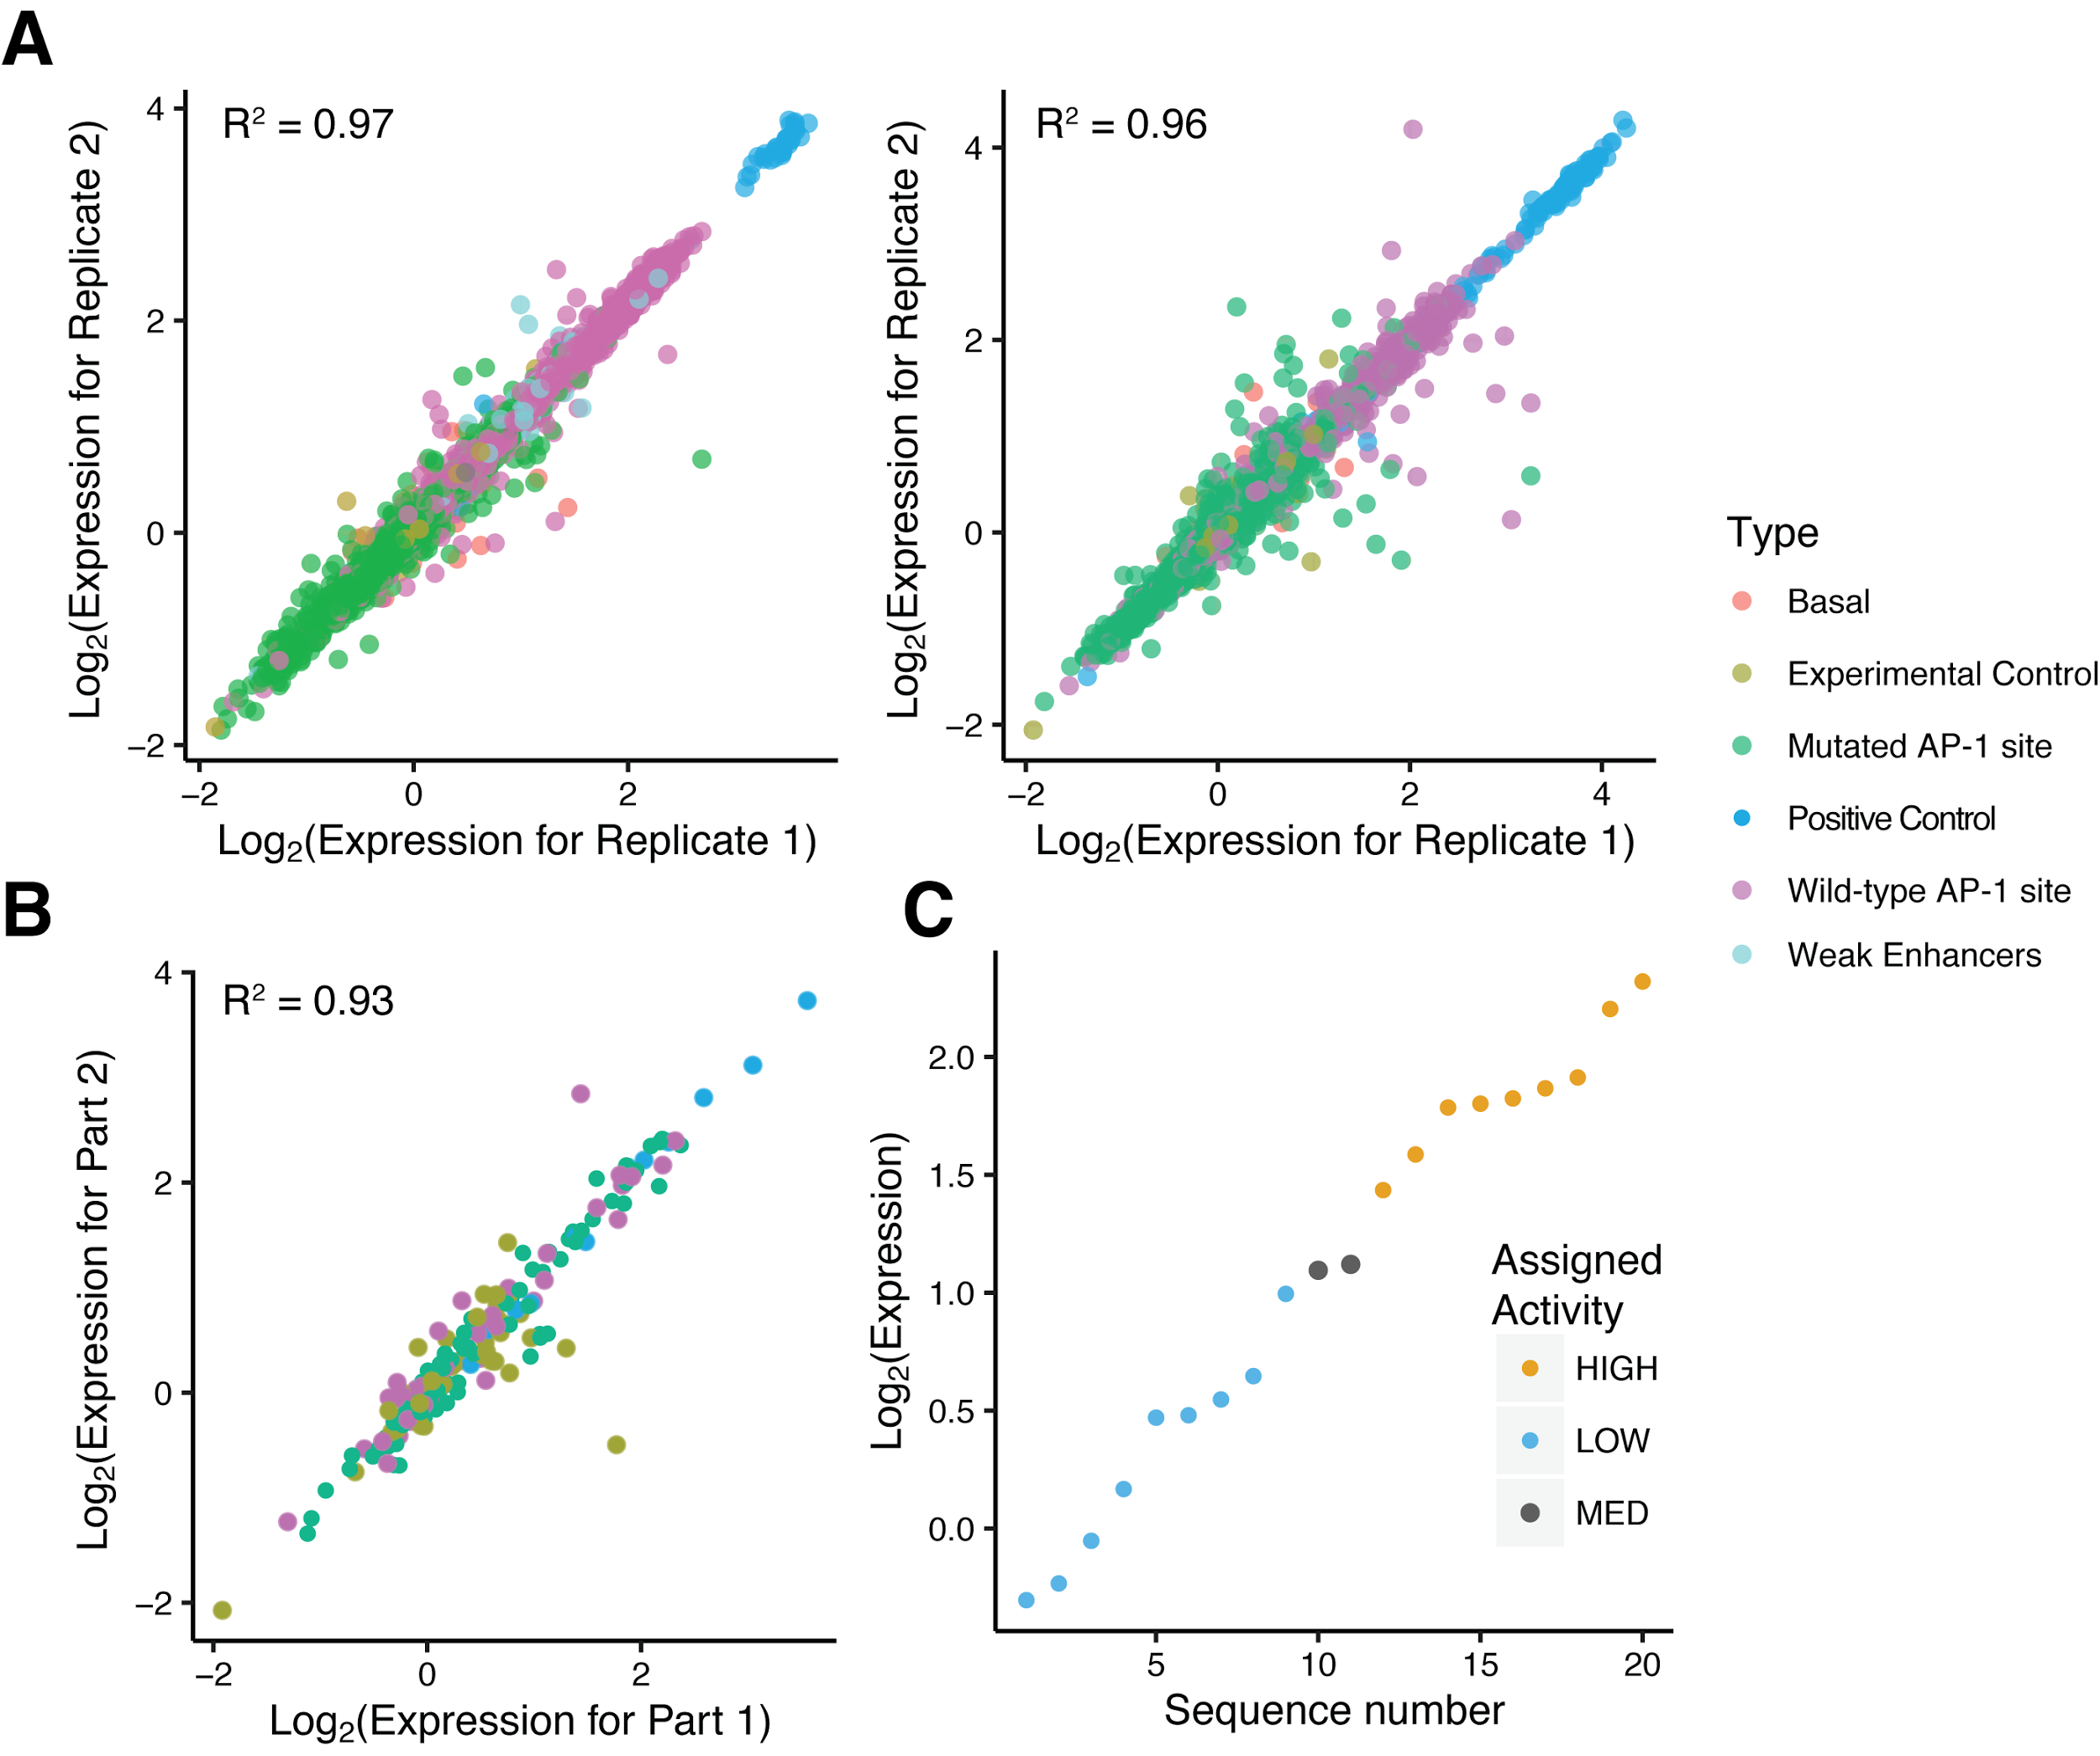
**

**Supplemental Fig S3**: Expression distribution of sequences in Library 2. ***A.*** We designed, cloned, transfected and sequenced the saturation mutagenesis library in two parts. Expression measurements from both parts were reproducible (min R2 = 0.96, L: Part 1, R: Part 2). Each point depicts the expression of a regulatory element averaged across four barcodes. Color of the point represents sequence category. ***B.*** We included common sequences in the two parts. The expression measurements were highly correlated between the two libraries (R2 = 0.9). Each point depicts the expression of a regulatory element averaged across 16 measurements (four barcodes in four replicates). Colors are same as in Panel A. ***C.*** Expression of 20 wild-type sequences is shown on the Y-axis. We annotated the wild-type sequences as LOW, MEDIUM and HIGH according to their measured expression in Library 2.


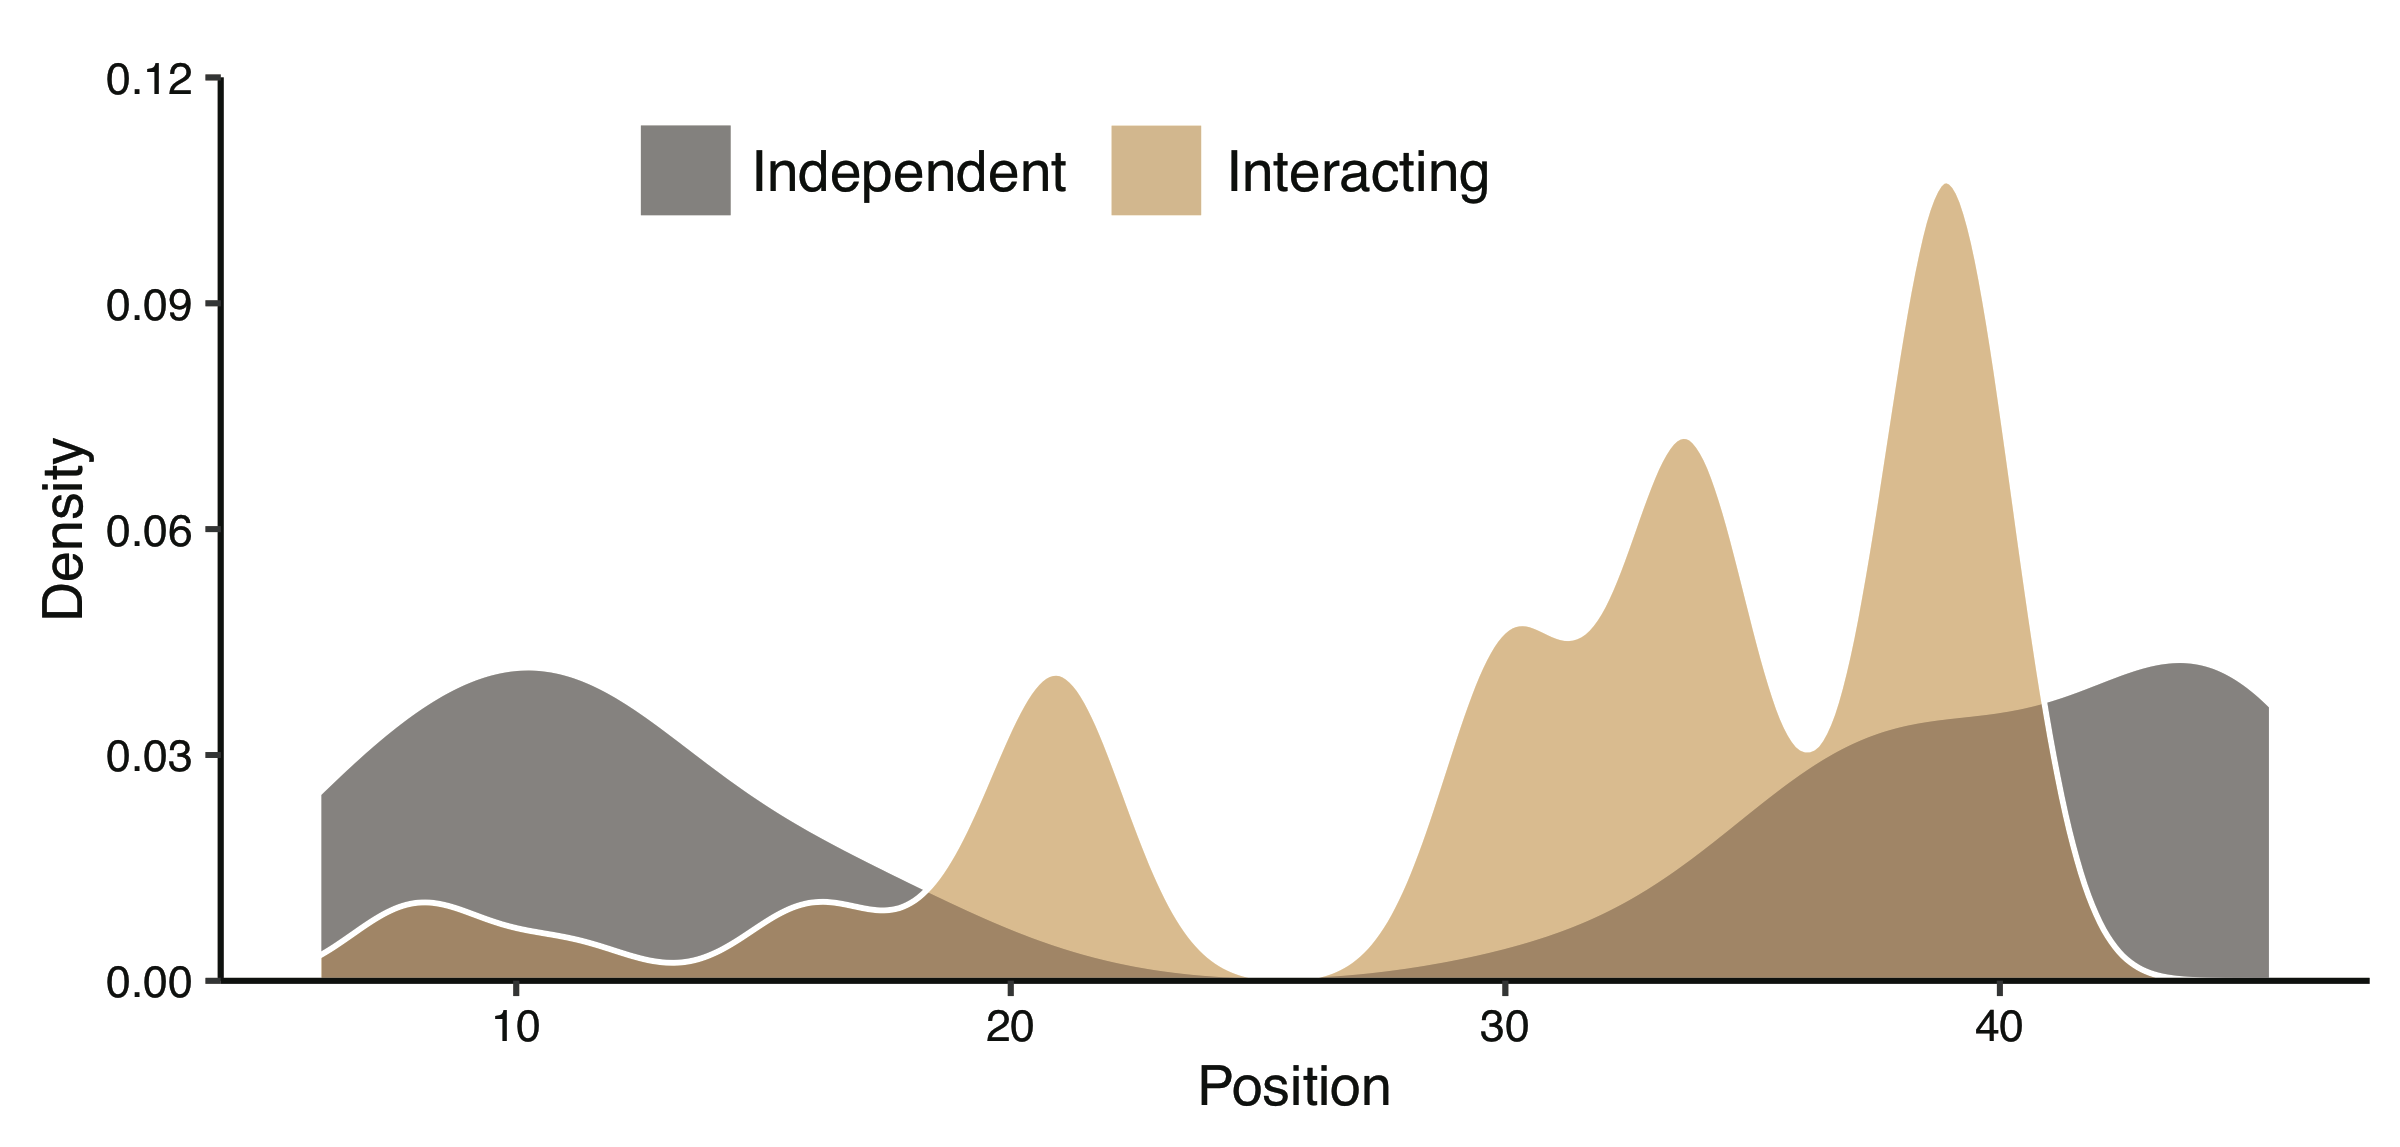


**Supplementary Figure S4**:Positional bias of independent (gray) and interacting (tan) motifs relative to the central AP-1 core for twenty sequences subject to saturation mutagenesis. Interacting motifs are enriched closer to the AP-1 core site.


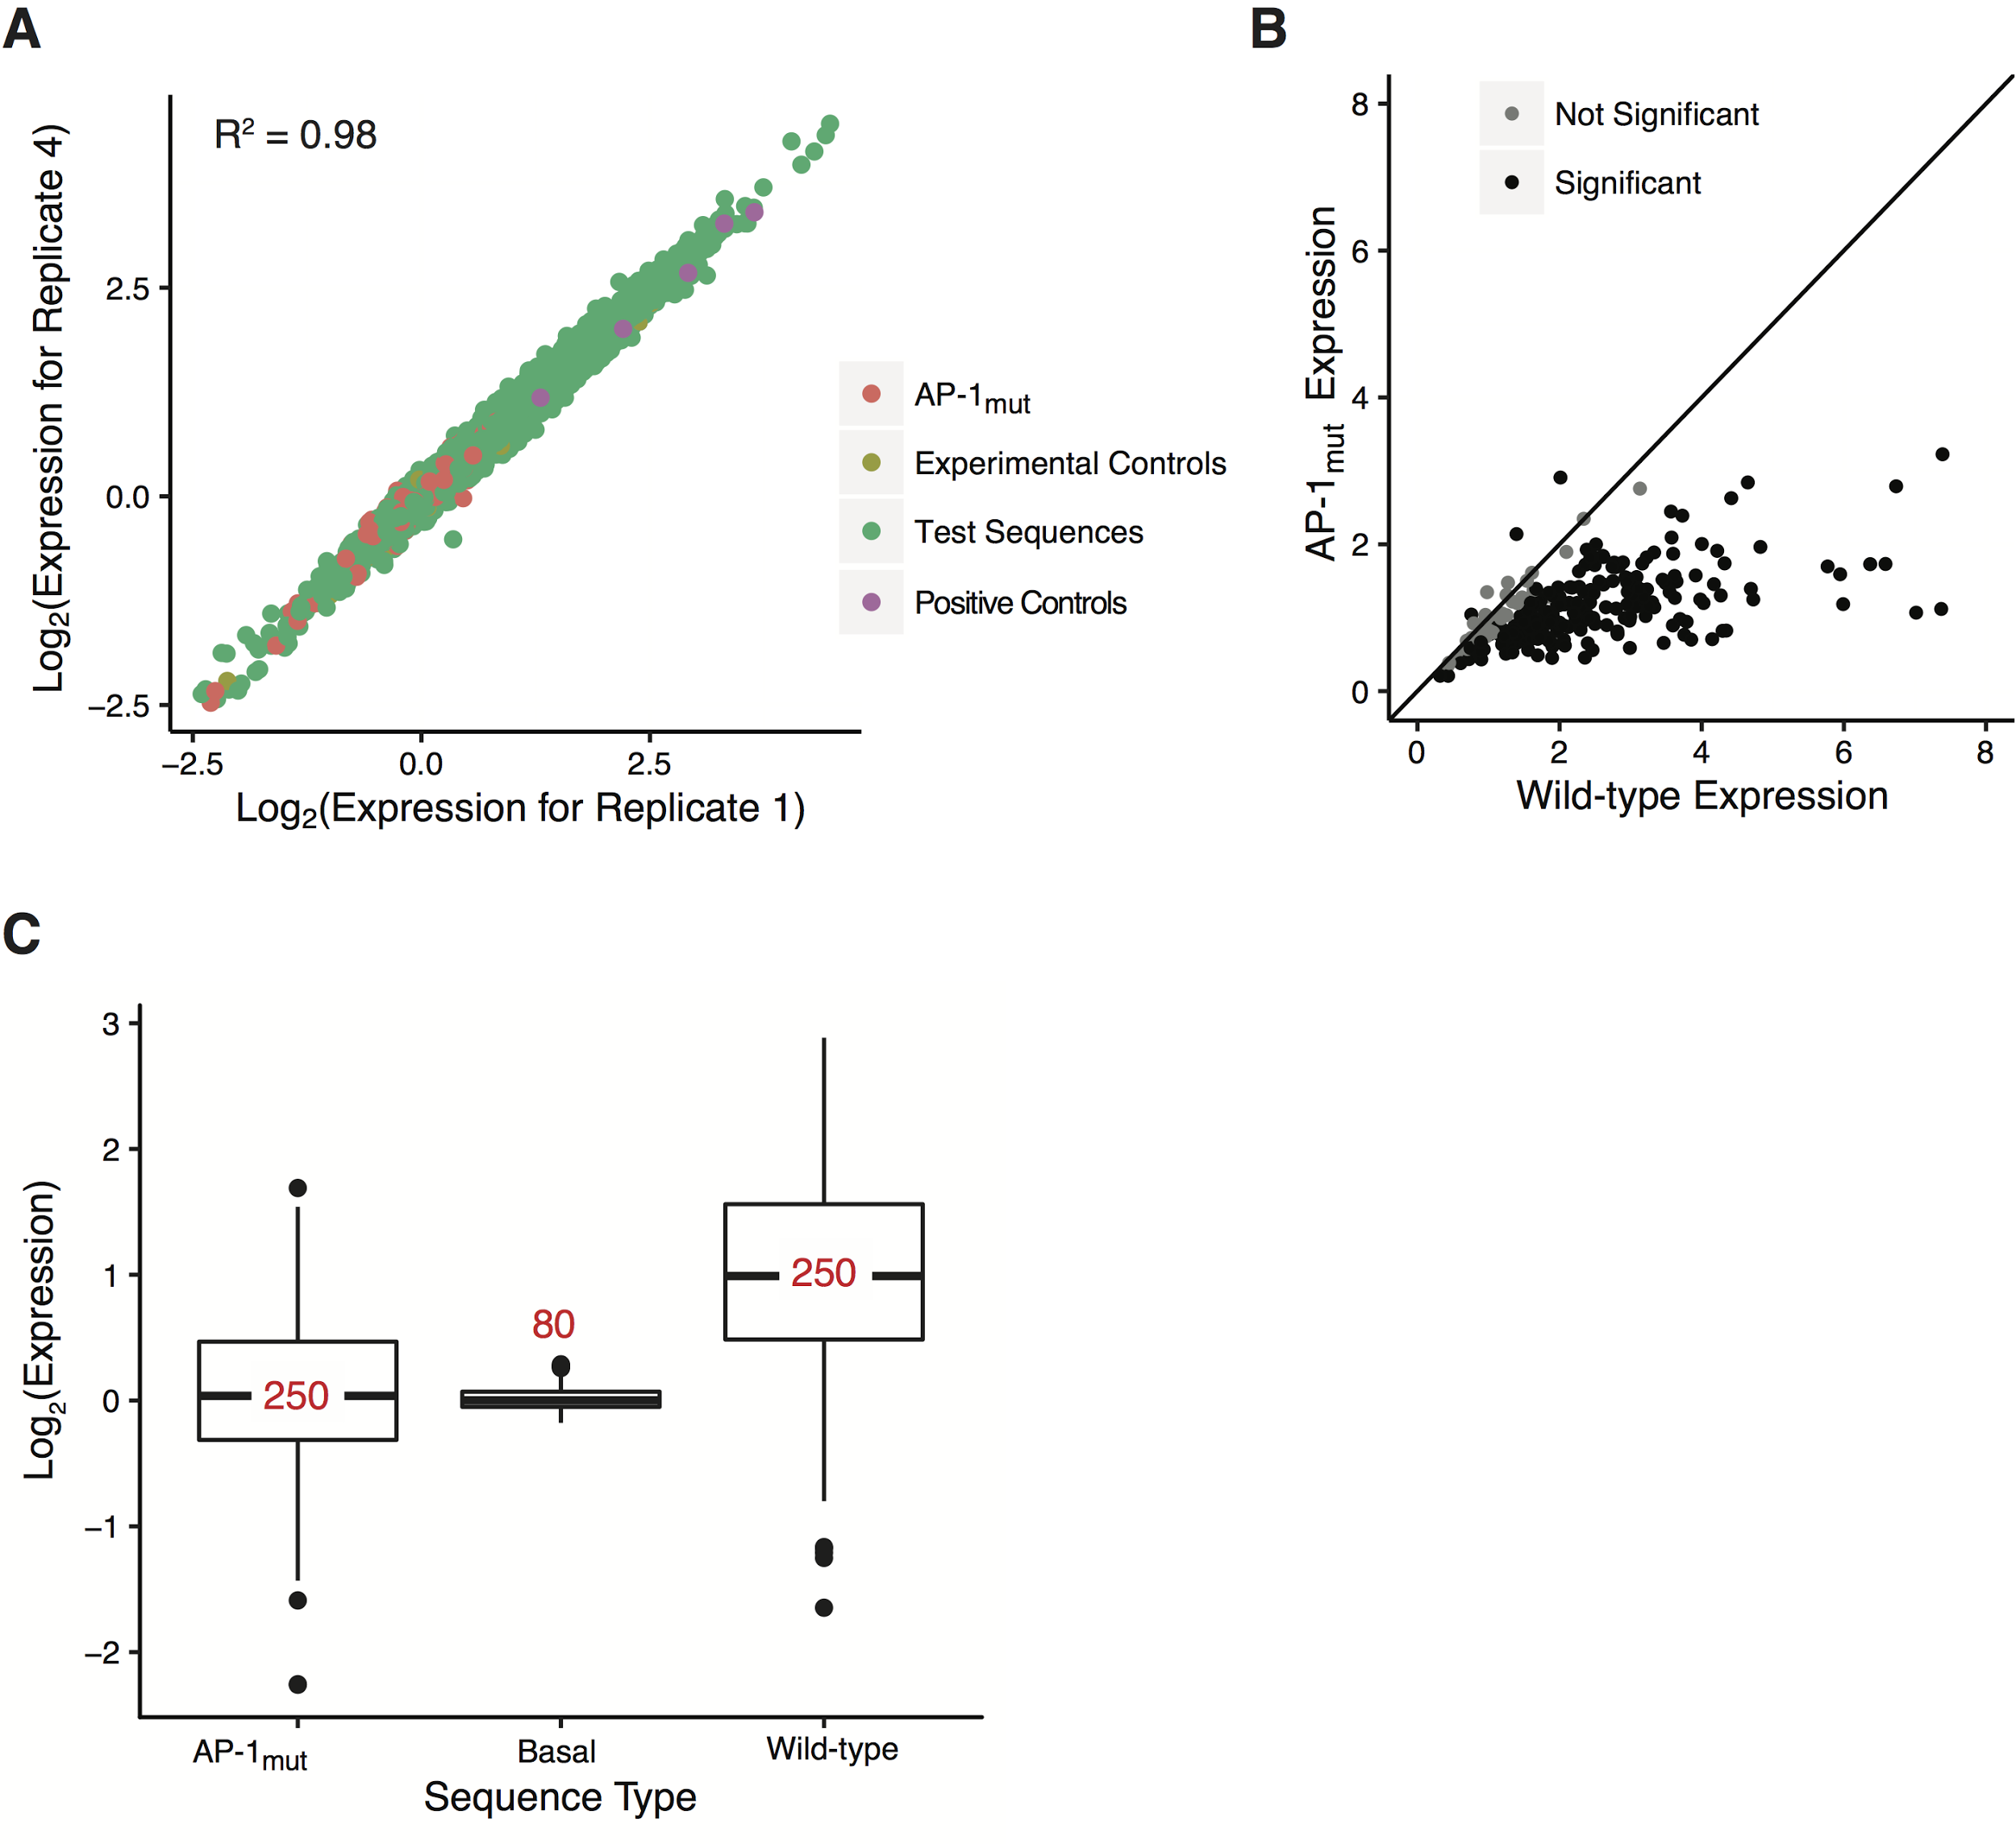


**Supplemental Fig S5**: Expression data of sequences from DHS regions in K562 cells. ***A.*** We performed four independent transfections of the plasmid library. Each point depicts the expression of a regulatory element averaged across five barcodes. Color of the point represents sequence category. Replicates 1 and 4 were the least correlated (R2 = 0.98) ***B.***Mutating the AP-1 site (AP-1mut) reduces expression. Wild-type expression is plotted on the X-axis and AP-1mut expression is plotted on the Y-axis. Each point depicts the expression of a regulatory element averaged across 20 measurements (five barcodes in four replicates). Color represents the statistical significance of the difference between wild-type and AP-1mut expression according to Wilcoxon test (Black: significant, *P* < 2e-04; gray: not significant) (R2 = 0.32) ***C.*** AP-1mut sequences drive lower expression than wild-type sequences. Median activity of AP-1mut sequences was the same as that of basal constructs. Numbers in red show the number of sequences in each category.


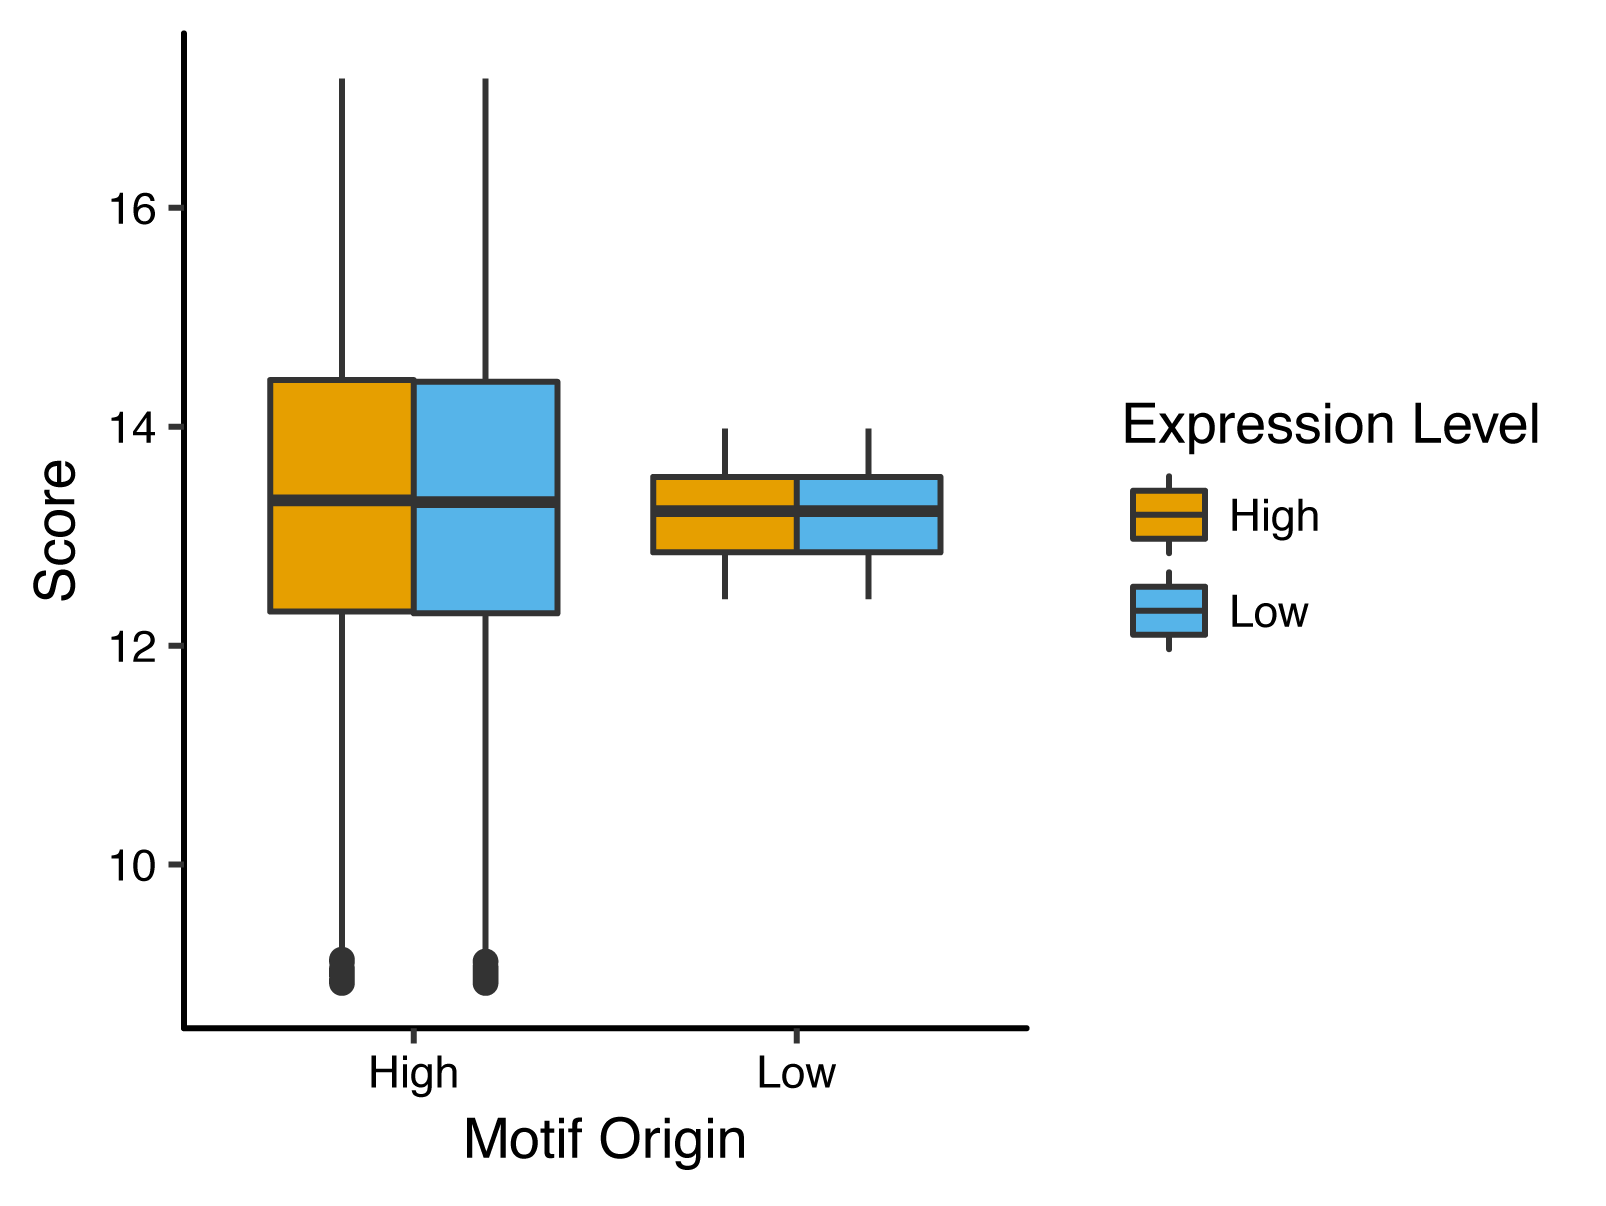


**Supplemental Fig S6**: PWMs derived from HIGH and LOW activity DHS cannot distinguish between these two classes. X-axis, PWMs derived from HIGH and LOW sequences using the MEME suite. Y-axis, scores for HIGH (Orange) and LOW (blue) sequences for both the motifs calculated using FIMO. The HIGH motif and the LOW motif both score HIGH and LOW sequences equally well.


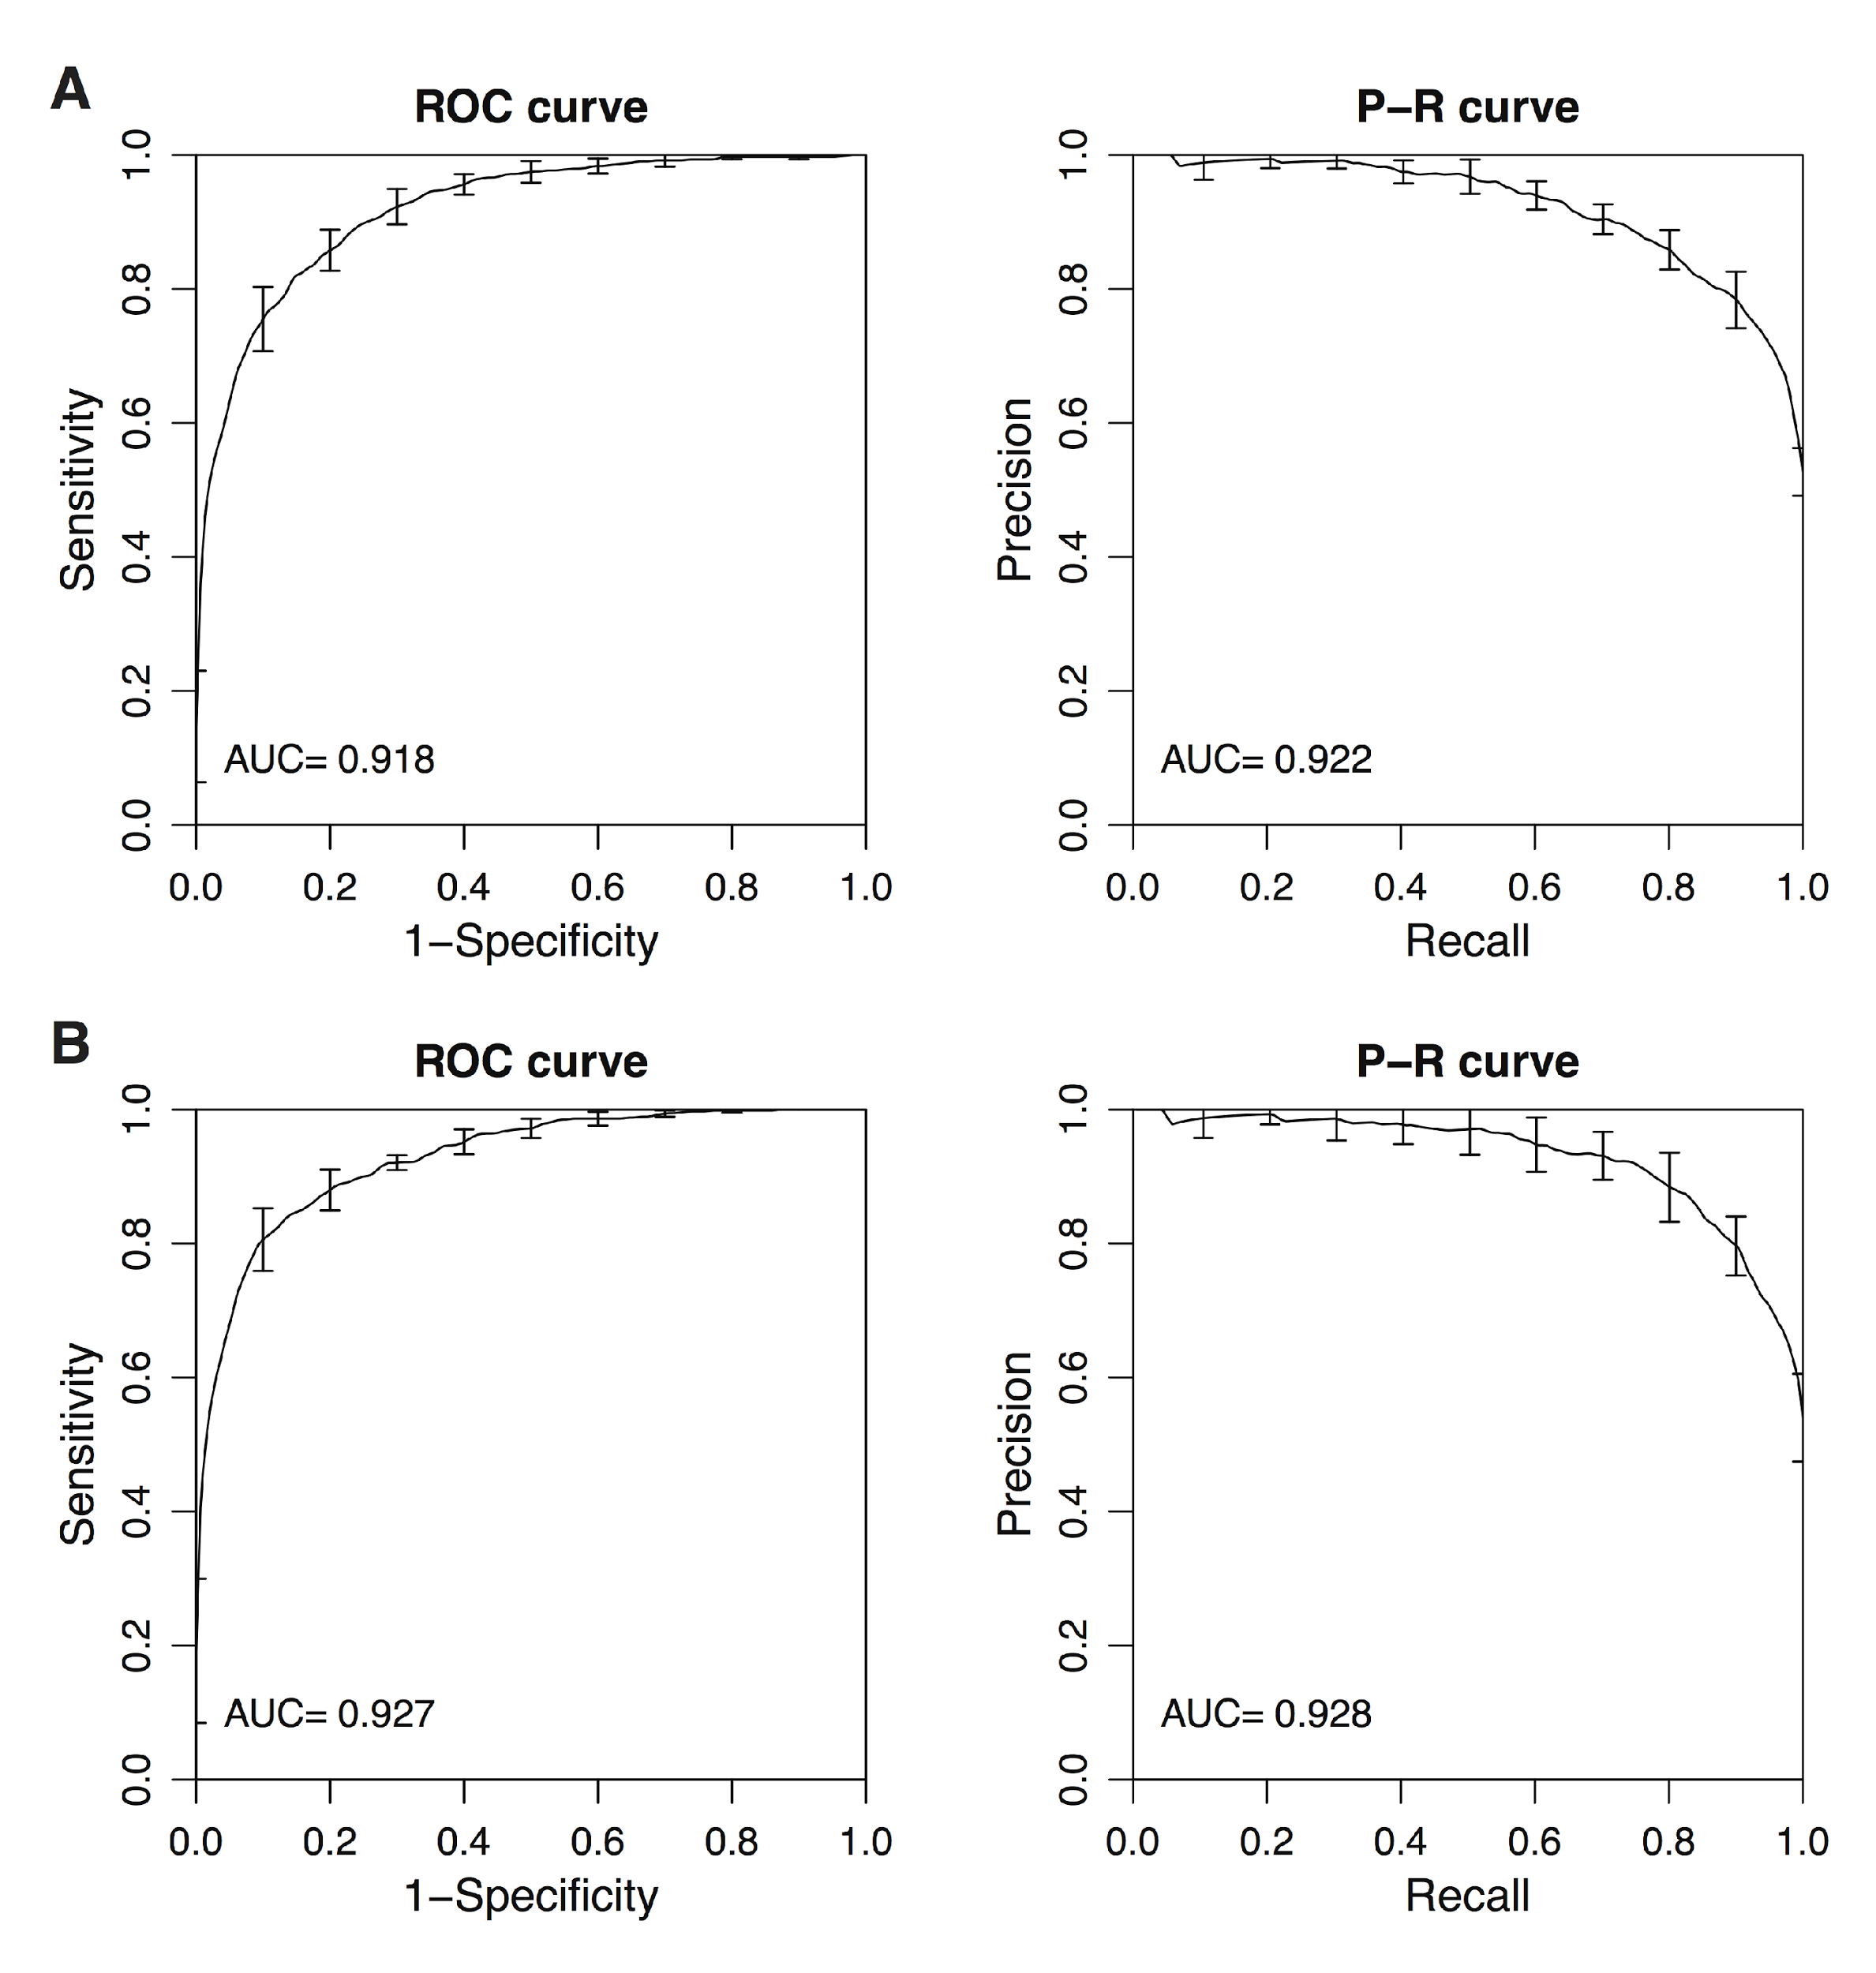


**Supplemental Fig S7**: Analysis of 1000 HIGH and 1000 LOW DHS sequences using gkmSVM ***A.*** Receiver operating characteristic(ROC)curve (Left) and precision-recall (PREC) curve (Right) from a 6-mer, ungapped model. ***B.*** ROC curve (Left) and PREC curve (Right) from an 8-mer, ungapped model.

**
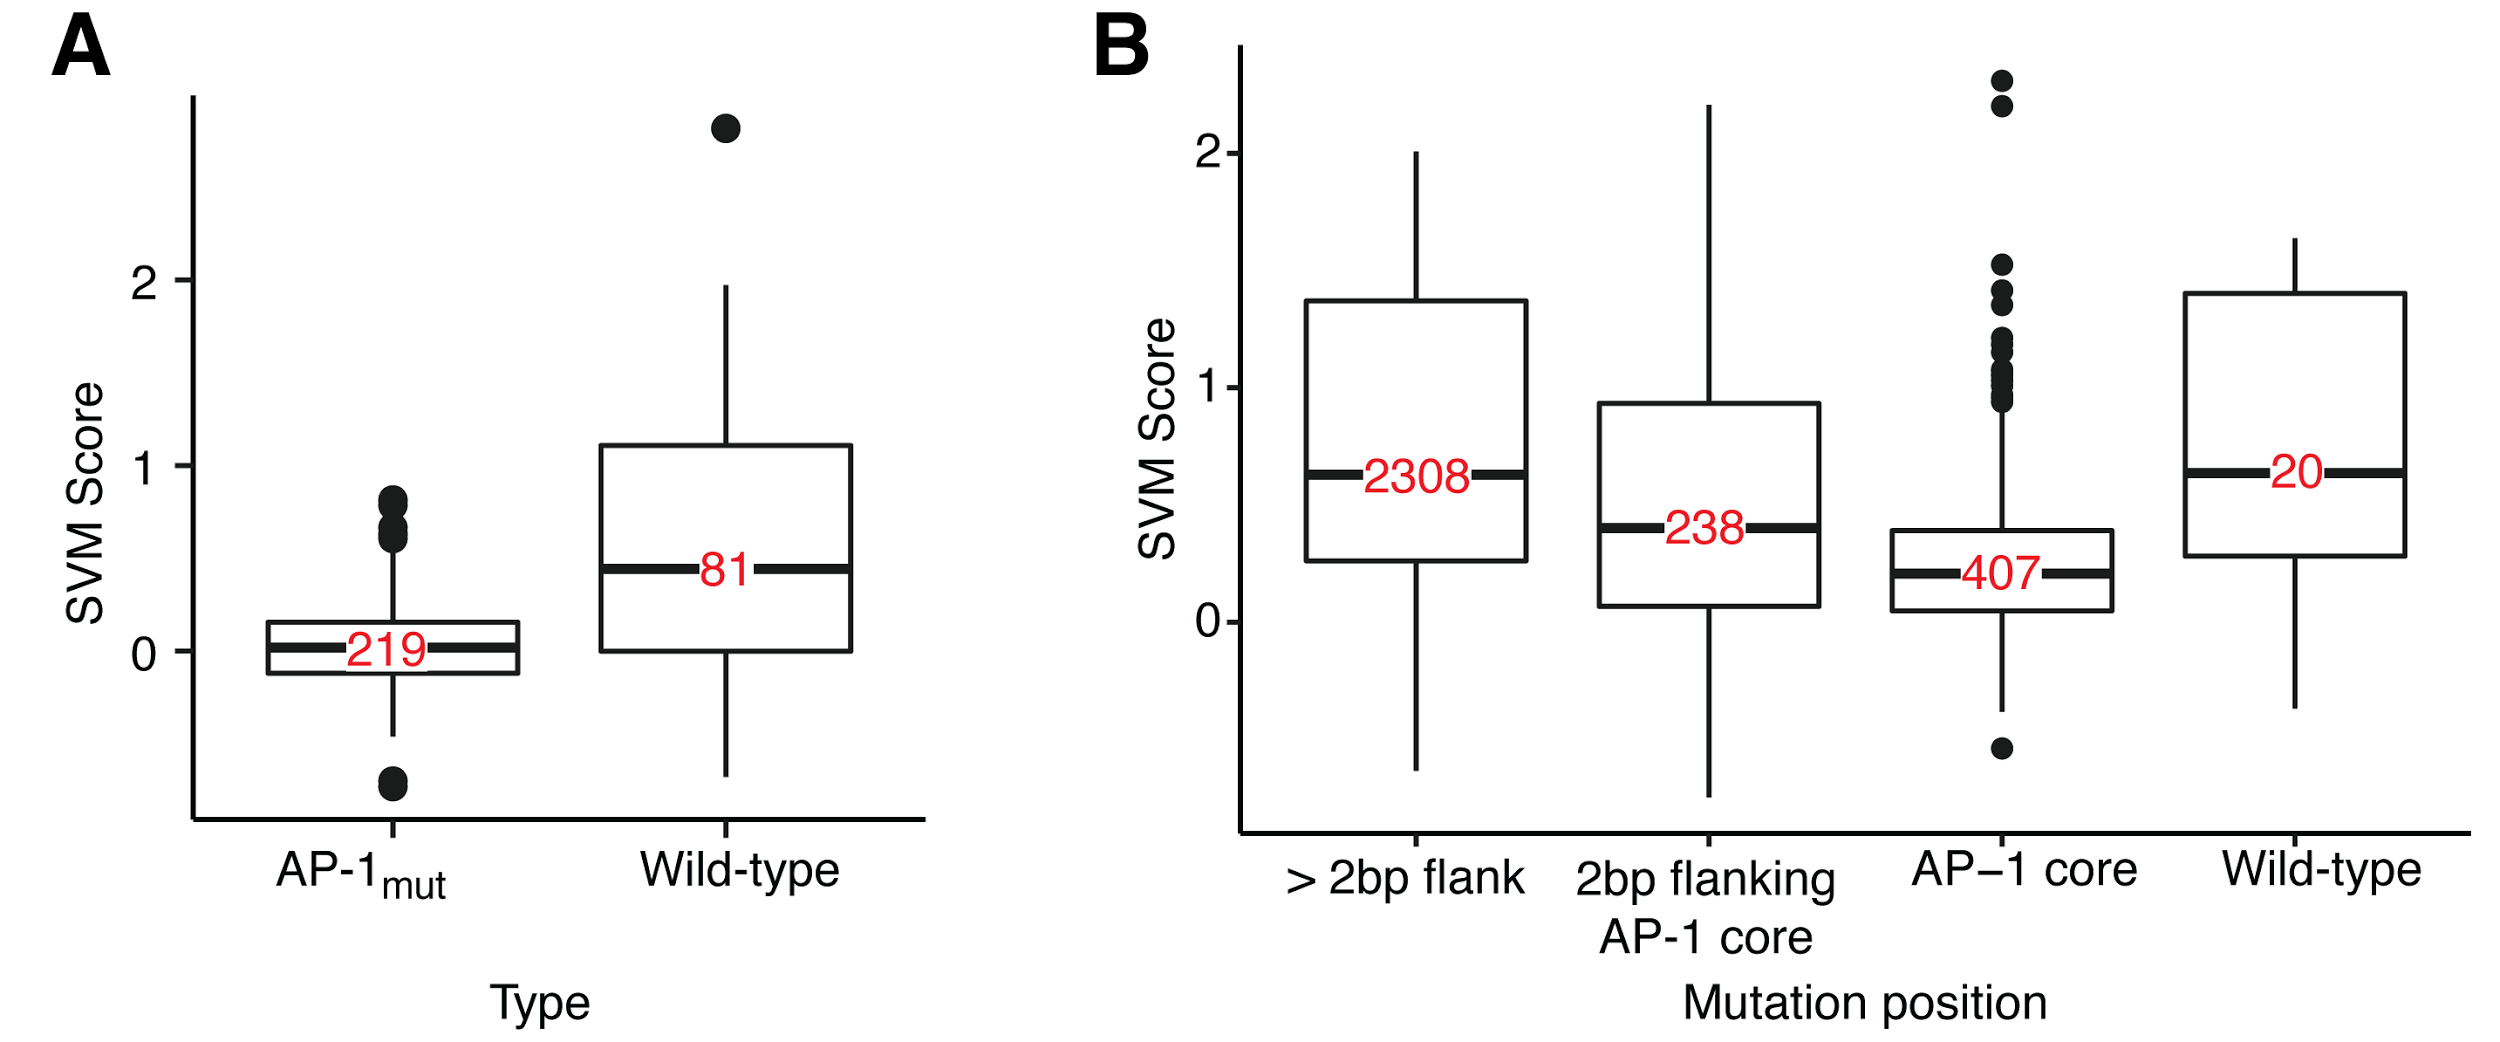
**

**Supplemental Fig S8**: Performance of a 10-mer gapped SVM trained on 1000 HIGH and 1000 LOW activity DHS sequences ***A.*** Library 1 included 81 fifty bp long wild-type sequences and two to three AP-1mut variants per sequence. AP-1mut sequences had lower SVM scores compared to sequences with wild-type AP-1 sites. Wilcoxon Test, *P* = 3.5e-09 ***B.*** Library 2 was composed of 20 wild-type elements and their single base mutants. Mutations in the AP-1 core had the lowest SVM score. Mutations in 2 base pairs flanking the AP-1 core motif had lower scores than mutations outside of these flanks. Numbers in red depict number of data points in each box. Bonferroni corrected Wilcoxon Test, *P* <0.05 for all comparisons except for >2bp flank & wild-type and 2bp flanking AP-1 core & wild-type.


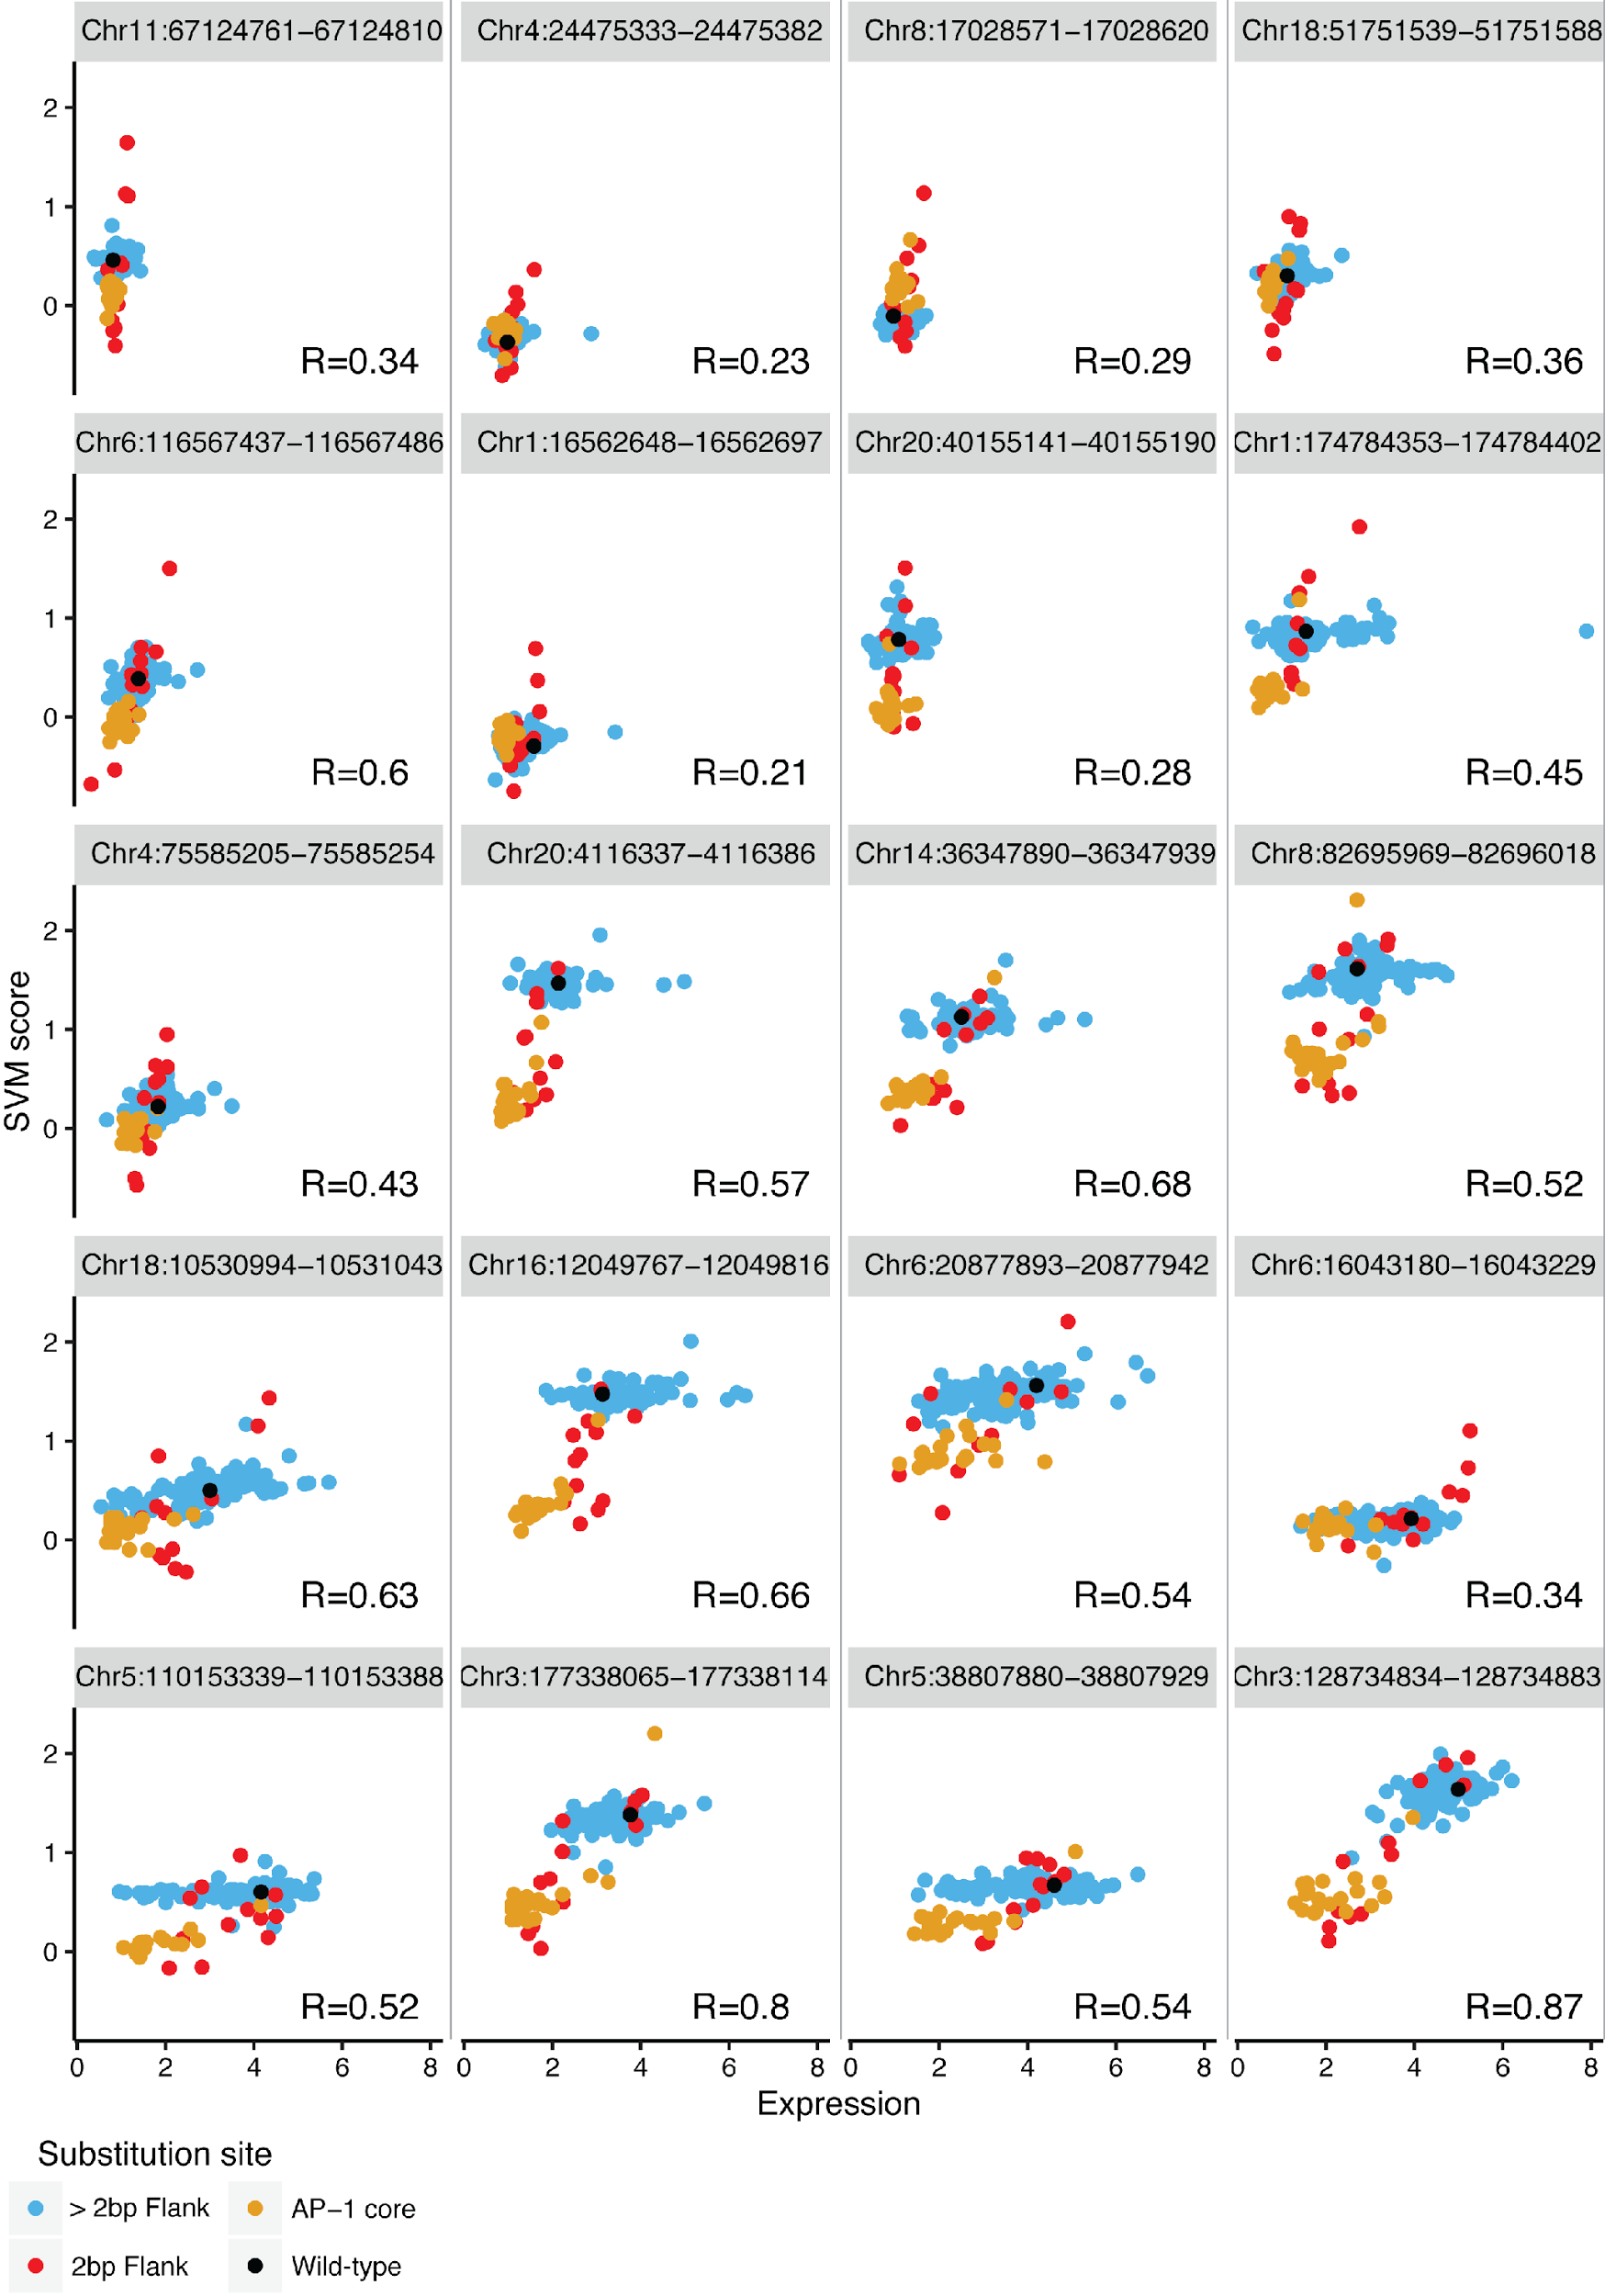


**Supplemental Fig S9:** SVM trained on DHS sequences predicted expression of saturation mutagenesis constructs. Expression measurements are shown on the X-axis and SVM score is shown on the Y-axis. Each point represents a sequence with one base pair substitution and color of the point represents the position of the mutation. Wild-type sequence is shown in black. Each subpanel shows a scatter plot for an individual sequence. SVM score is correlated with expression for each sequence. Sequences are arranged by the expression level of the wild-type sequence (Left to Right and Top to Bottom). The correlation coefficient is itself correlated with wild-type expression (R=0.7, data not shown).


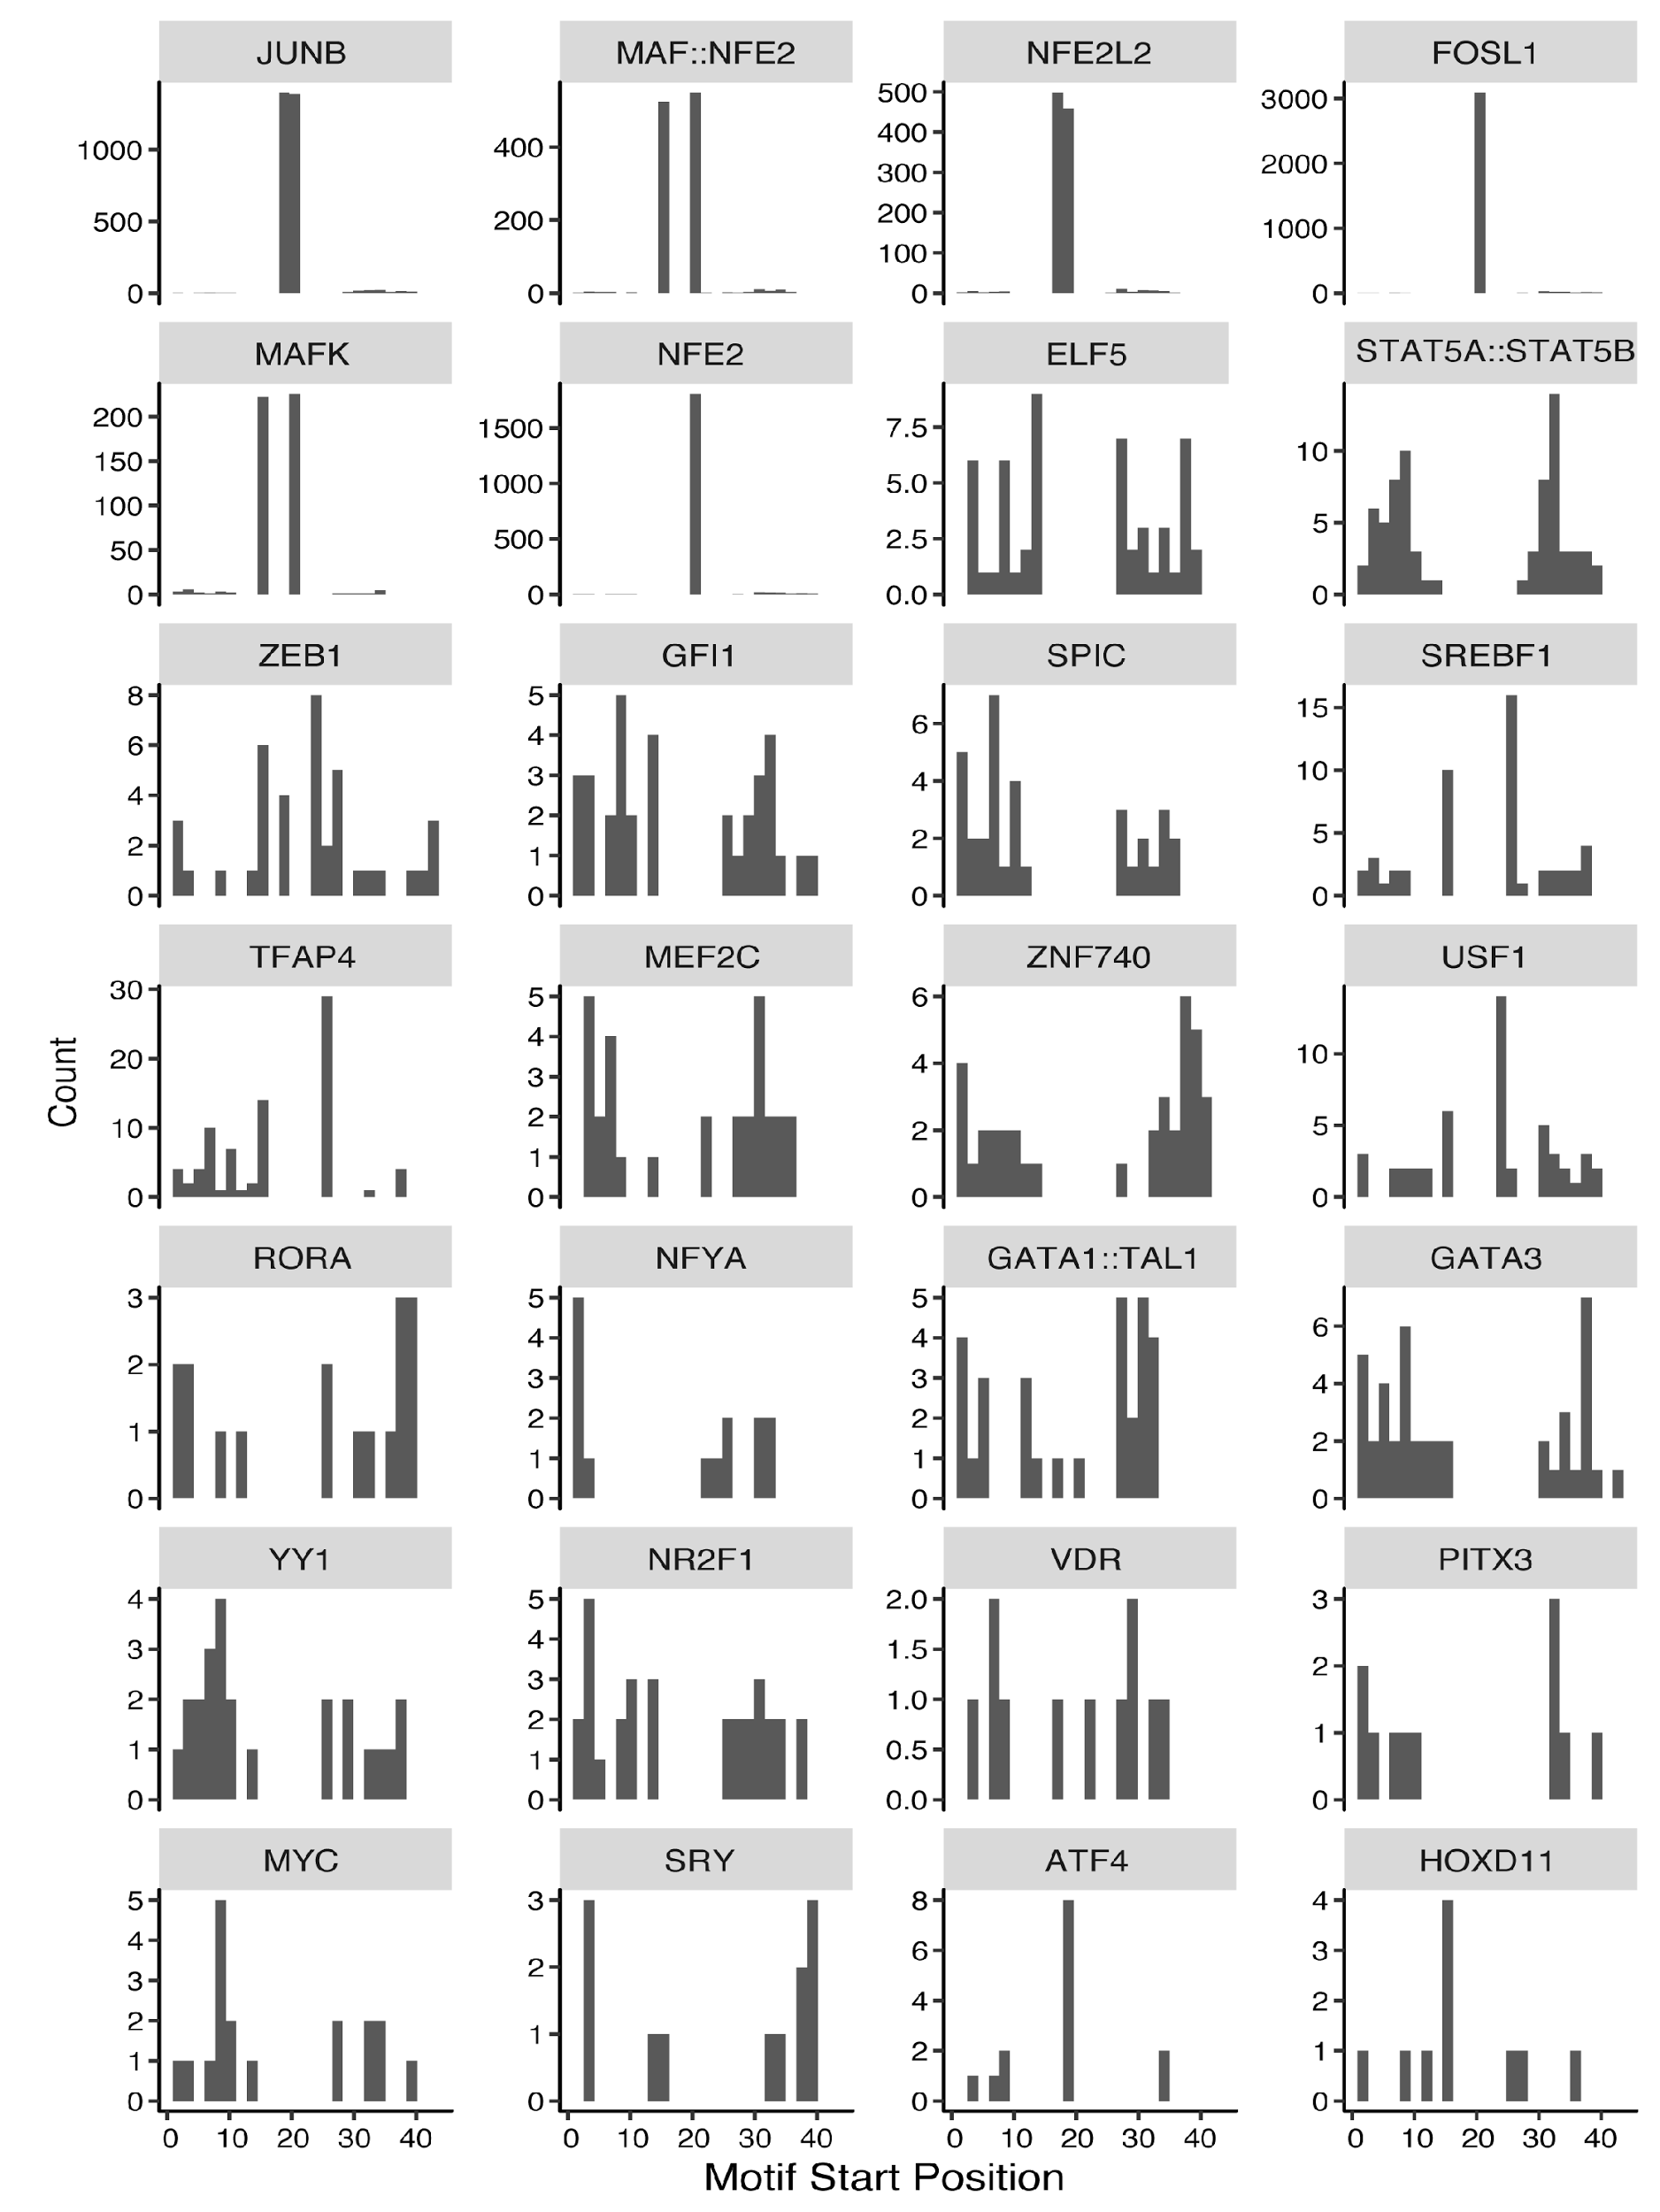


**Supplementary Figure S10:** Position distributions of matches to PWMs of 28TFs from logistic regression across 1000 HIGH and 1000 LOW sequences. X-axis, position along the sequence. Y-axis, number of matches in both orientations at a particular position across the 2000 sequences. Panels are arranged in decreasing order of power of the individual motif to classify HIGH from LOW sequences. The top 6 PWMs all either match or overlap the AP-1 site.


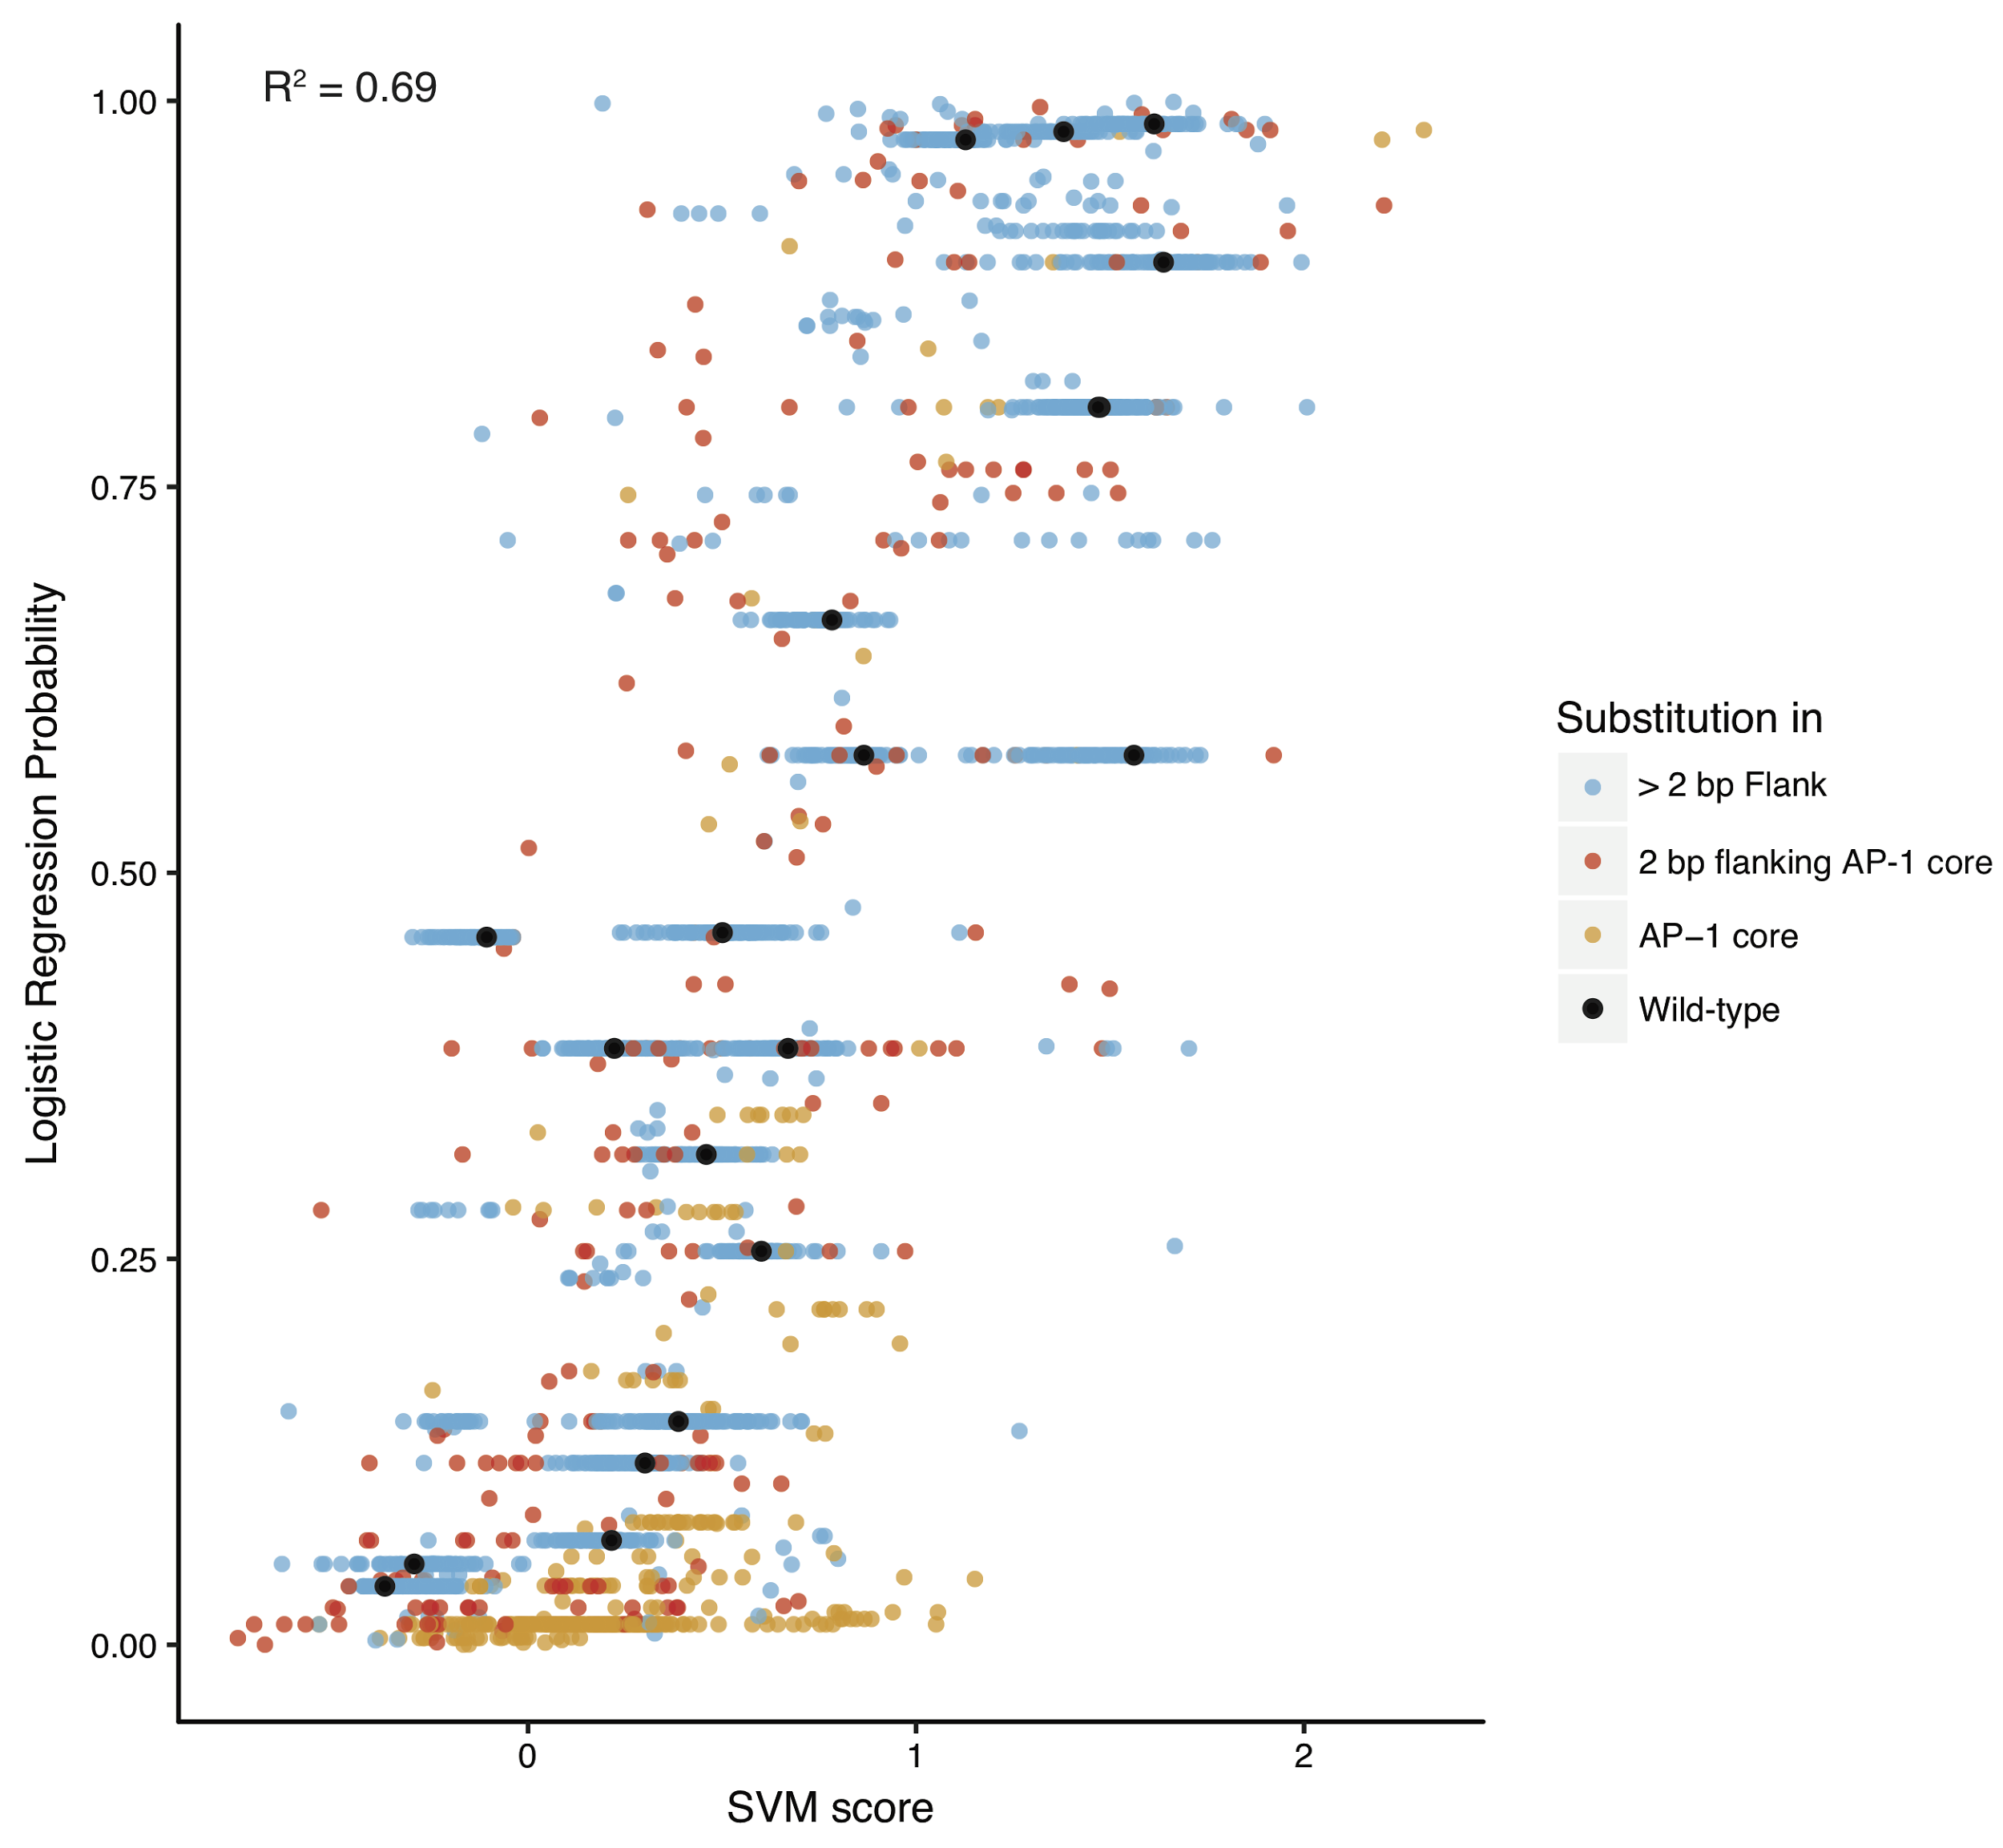


**Supplemental Fig S11:** Predictions of saturation mutagenesis library from logistic regression model and gkmSVM are highly correlated. Each point represents a sequence with one base pair substitution and color of the point represents the position of the mutation. Wild-type sequences are shown in black.


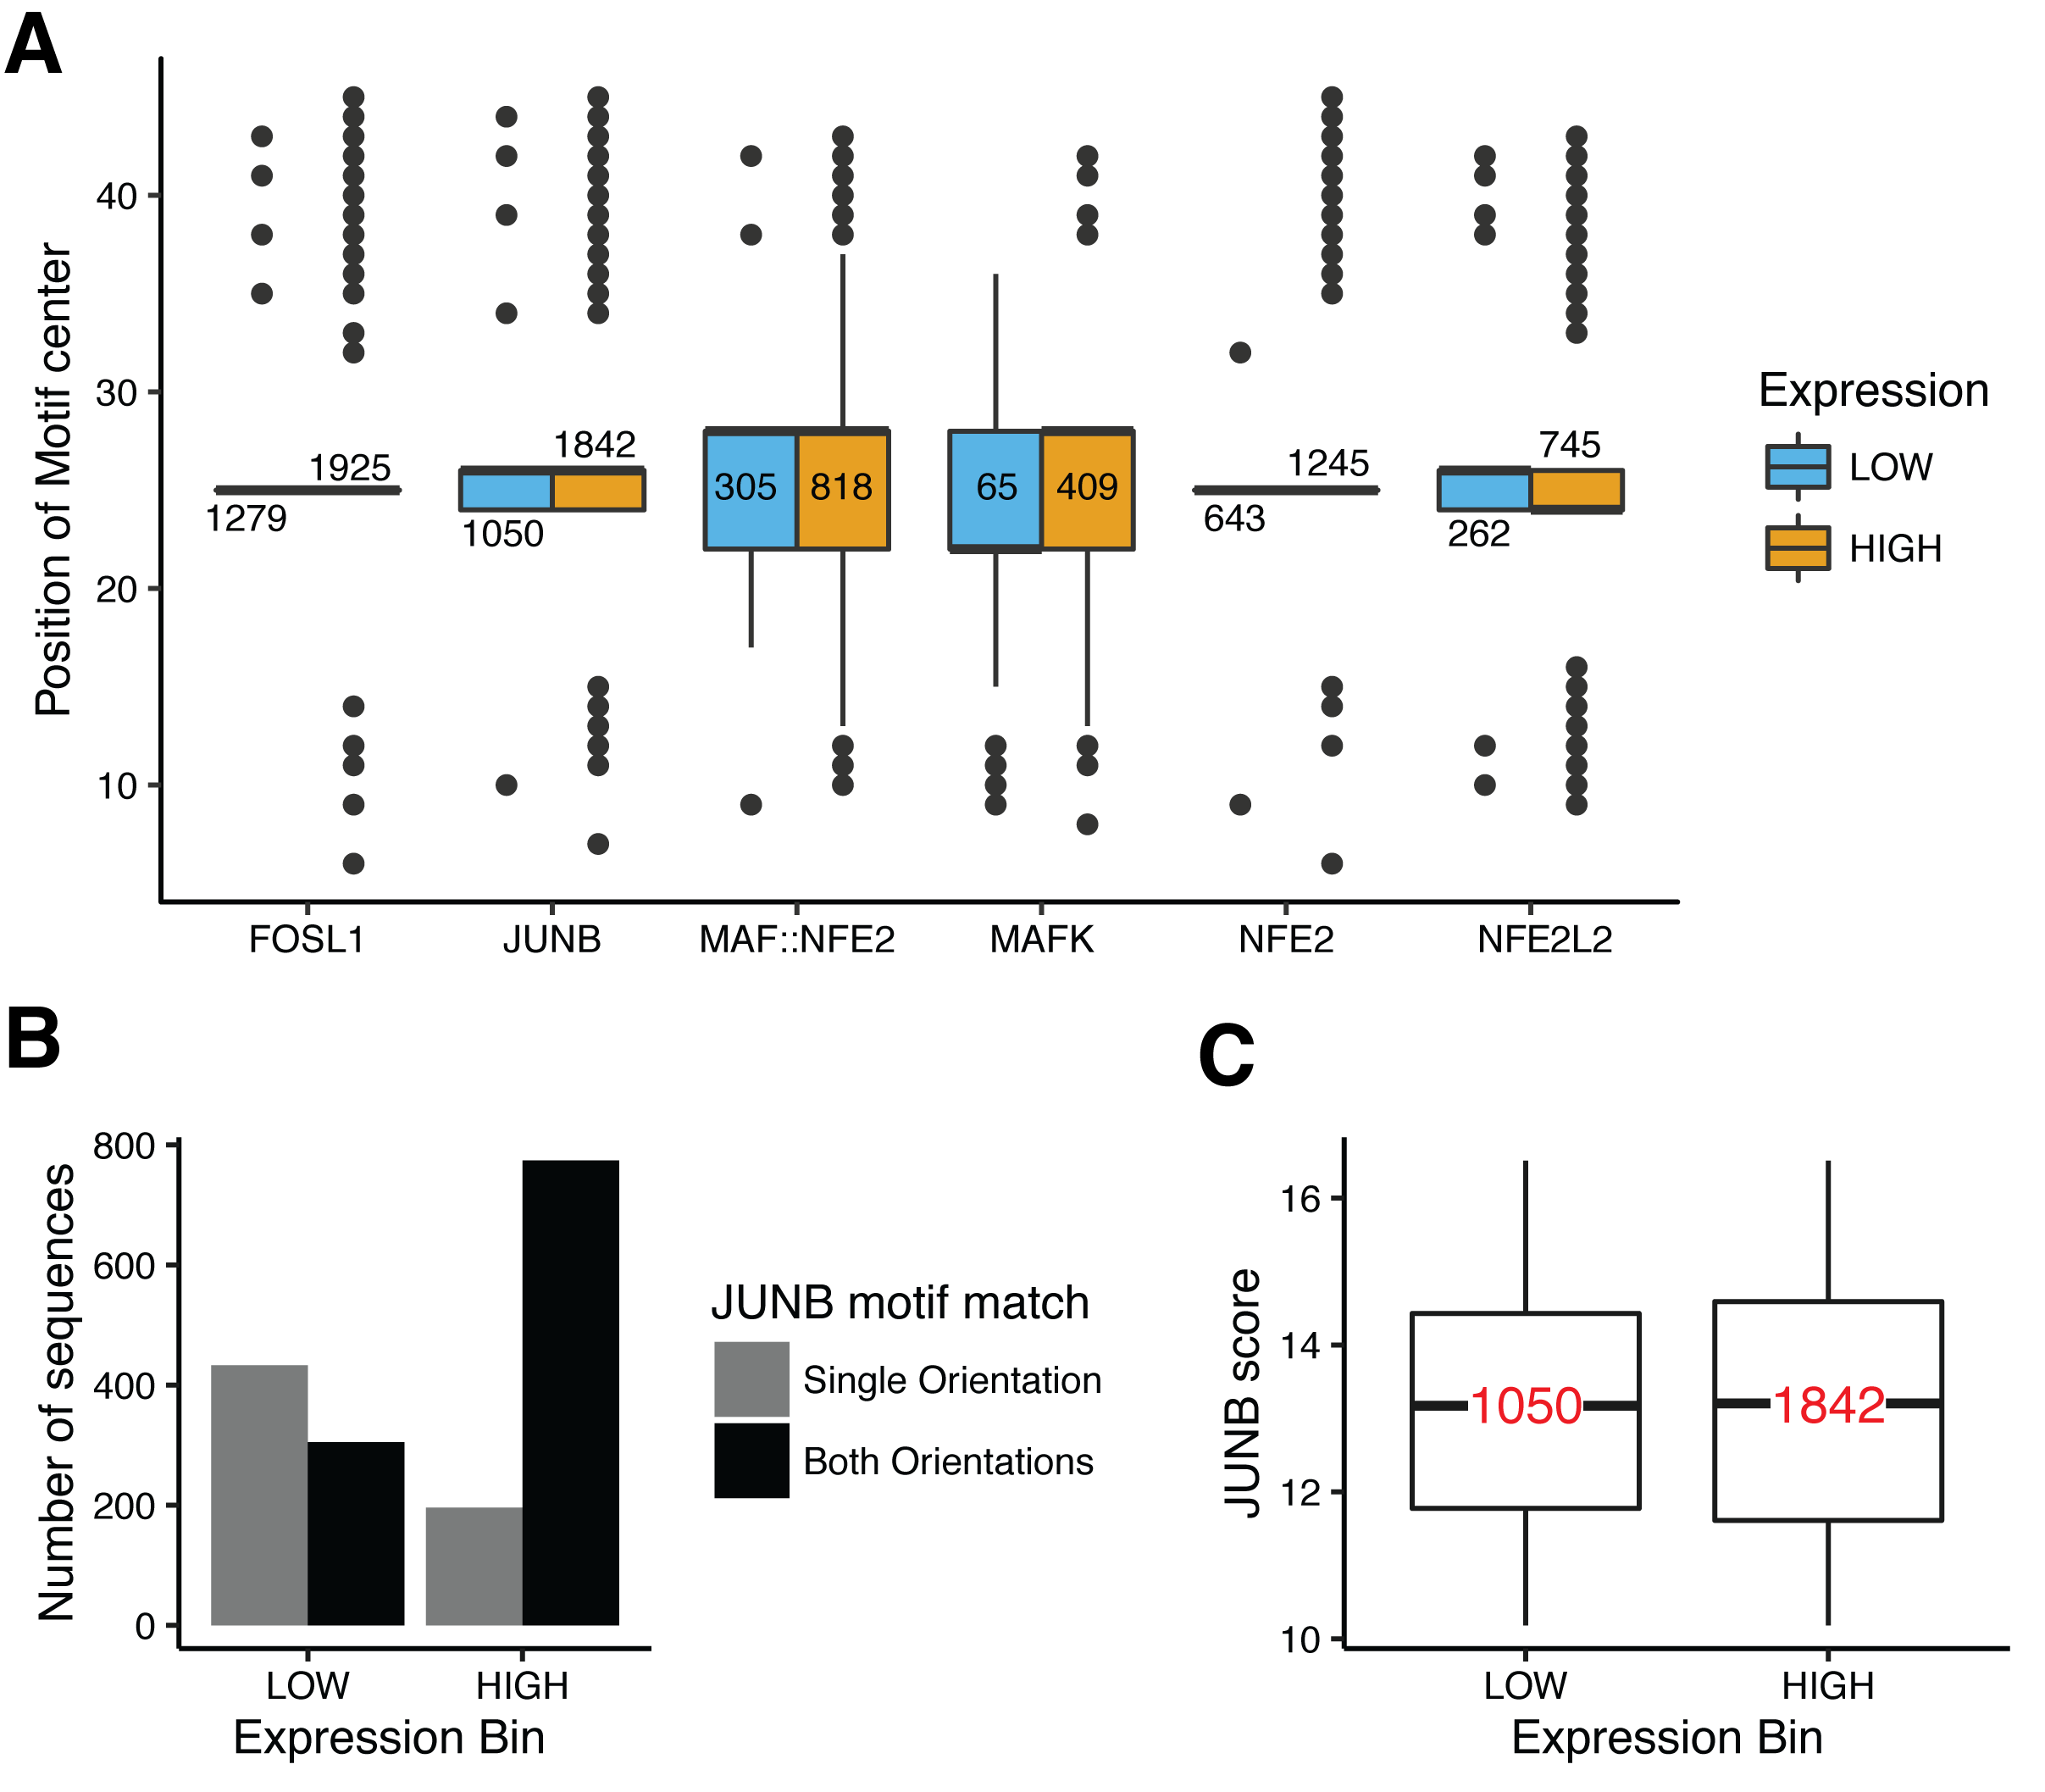


**Supplementary Fig. S12:** HIGH sequences contain AP-1 sites that bind multiple AP-1 TFs in both orientations. ***A.*** Number of matches for different AP-1 motifs are shown for 1000 HIGH (Orange) and 1000 LOW (Blue) groups. Position of the center of the motif is plotted on the Y-axis. More than 1000 matches in each group indicate that some sequences had two or more instances of the motif. AP-1 sites in the center of HIGH sequences score well for multiple transcription factors in both orientations. ***B.*** 77% of the sequences in the HIGH group have AP-1 sites that score well for JUNB motif in both orientations, whereas only 30% of the sequences in the LOW group have AP-1 sites that score well for JUNB motif in both orientations. ***C.*** JUNB motif match score (FIMO) distributions are not statistically different for HIGH and LOW sequences (Wilcoxon test, *P* = 0.75,). Numbers in red depict number of data points in each box.

**
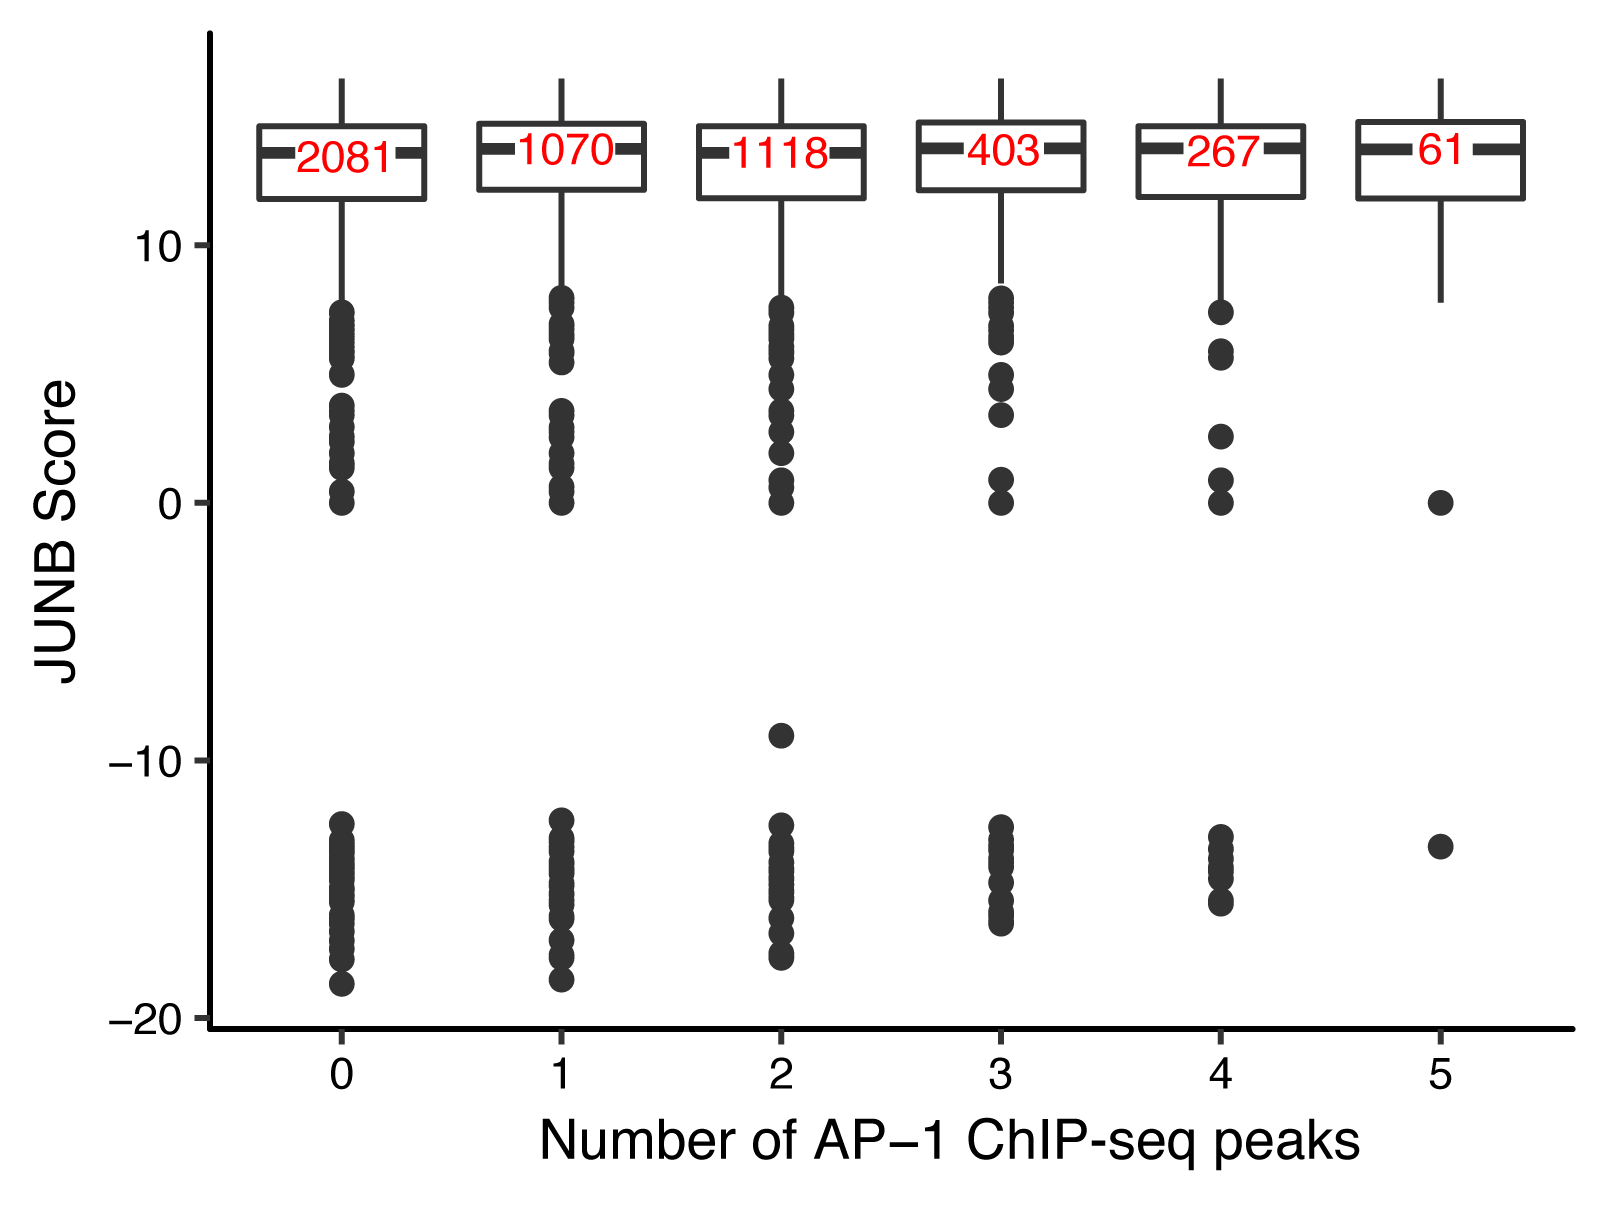
**

**Supplementary Fig. S13:** Sequences in DHS regions with different number of AP-1 ChIP-seq peaks have similar JUNB motif score distributions. X-axis, number of peaks observed in total in five ChIP-seq experiments (JUNB, MAFF, MAFK, NFE2 and FOSL1 (The ENCODE Project Consortium 2012)). Y-axis, score for the JUNB PWM (JASPAR database) calculated with FIMO for 5000 DHS sequences. In most sequences, the AP-1 site matched the JUNB PWM in both orientations with different scores. We used the higher score for this analysis. There were no significant differences between groups using the Wilcoxon test (*P* = 1).

**
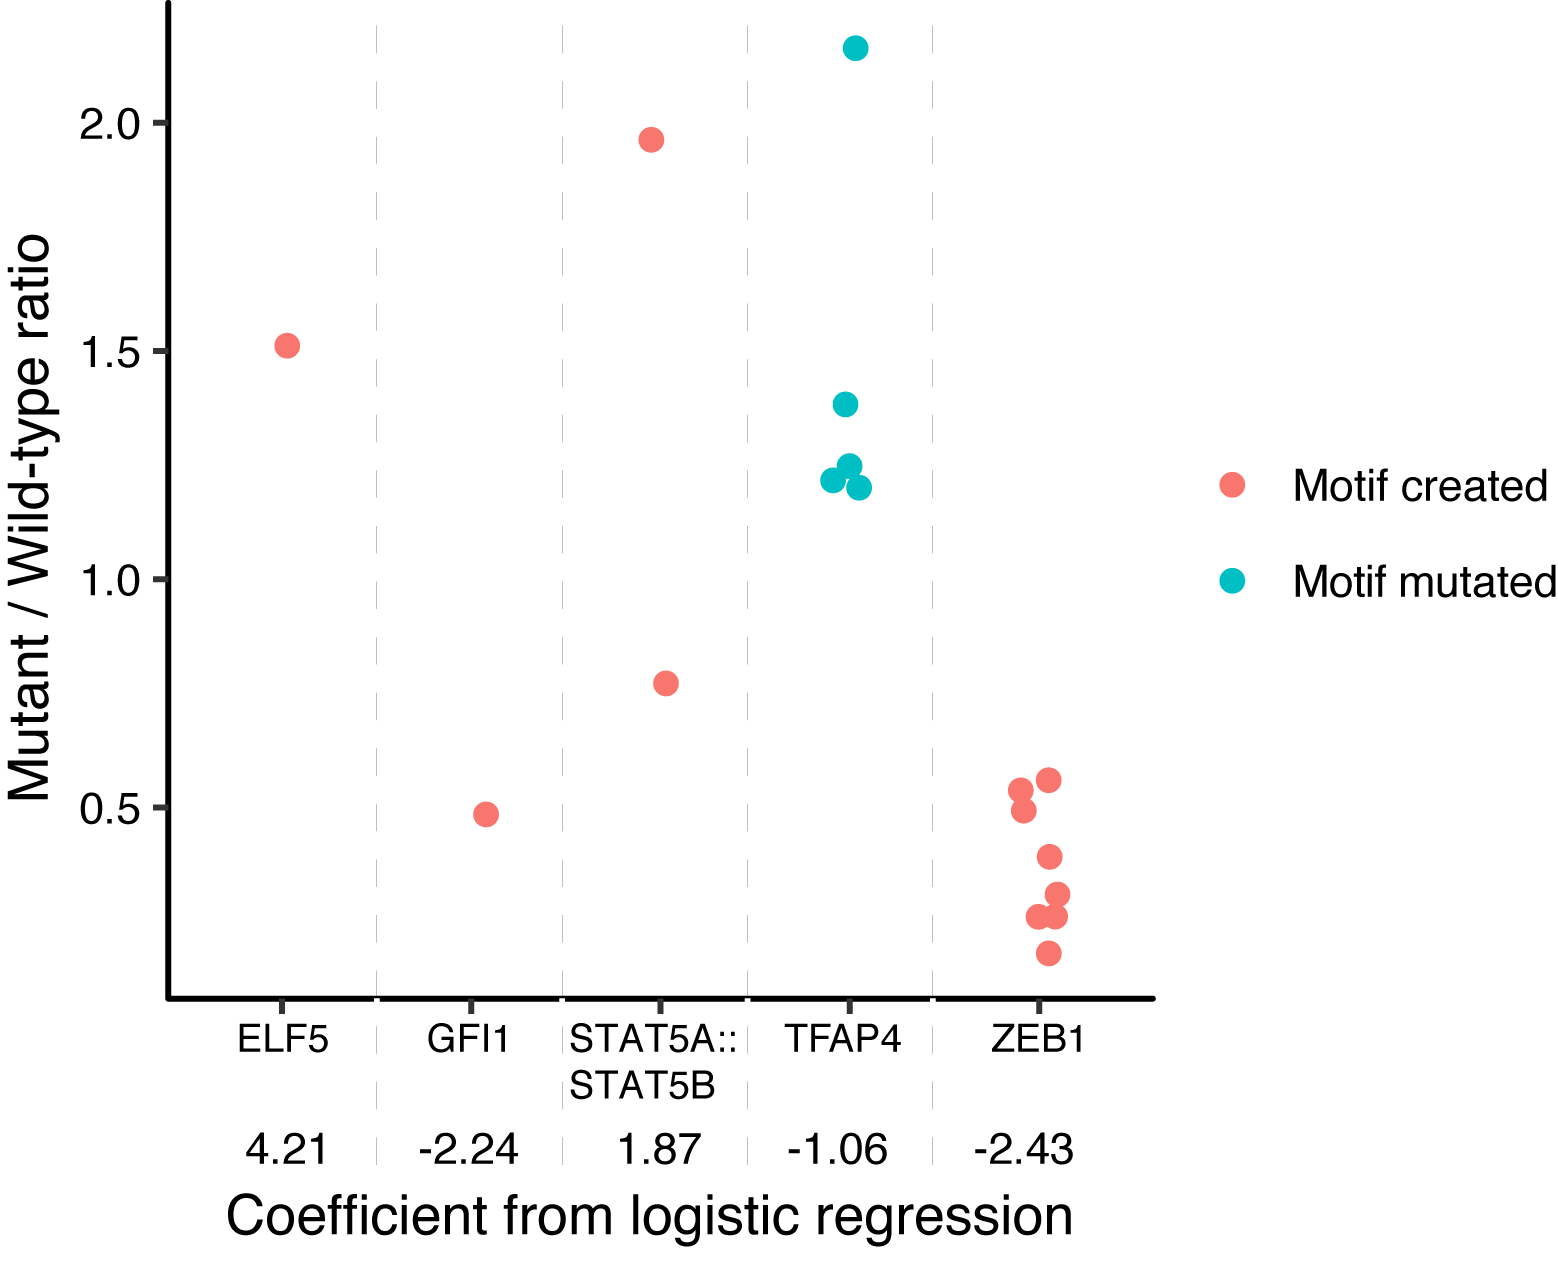
**

**Supplementary Fig. S14:** The effect on expression due to creation or disruption of a TF in Library 2 matches prediction from the logistic regression model built on data from Library 3. X-axis, five most significant TFs from logistic regression whose motifs were created or mutated because of substitutions in the sequence flanking the AP-1 binding sites. Coefficients from the logistic regression are mentioned below the TF name. Y-axis, expression of a sequence with substitution normalized by wild-type expression. For ELF5, a substitution created a motif that drove high expression, which is consistent with its positive coefficient from the logistic regression model. For TFAP4, mutating the motif increased expression, consistent with its negative coefficient.
